# Supplementary material
Source: PubMed Central journal article supplement (PMC9168923)

## Supplemental Online Content

Basch E, Schrag D, Henson S, et al. Effect of electronic symptom monitoring on patient-reported outcomes among patients with metastatic cancer: a randomized clinical trial. *JAMA*. Published online June 5, 2022. doi:10.1001/jama.2022.9265

**eTable 1.** Patient-Reported Outcome (PRO) Weekly Survey Items and Alert Notification Criteria

**eTable 2.** Subgroup Analysis Variables

**eTable 3.** Roster of Participating Practices, Locations, Allocations, and Patient Accrual

**eTable 4.** Intracluster Correlation Coefficients for Each Patient-Reported Outcome Endpoint

**eTable 5.** Physical Function, Symptom Control, and Health-Related Quality of Life Mean Score Estimates and Differences in Mean Changes From Baseline Between Arms at Each Visit

**eTable 6.** Proportion of Patients in the Patient-Reported Outcome (PRO) Intervention Arm and Control Arm With 5-Point and 10-Point Changes in Physical Function, Symptom Control, and Health-Related Quality of Life

**eTable 7.** Preplanned Subgroup Analysis of Physical Function, as Measured by the EORTC QLQ-C30

**eTable 8.** Individual Symptom Scale Mean Score Estimates and Differences Between Groups in Mean Change From Baseline at Each Measured Timepoint, From the EORTC QLQ-C30 Questionnaire

**eTable 9.** Completion Rates by Study Week

**eTable 10.** Alerts Triggered by the Weekly Survey System to the Care Team, by Symptom

**eFigure 1.** Example Patient-Level Educational Materials for Home Symptom Self-management

**eFigure 2.** Example Clinician-Level Educational Materials for Symptom Management

**eFigure 3.** Example Actual Clinician Report Showing Longitudinal Trajectory of Patient-Reported Outcomes (for Visualizing/Printing at Clinic Visit)

**eFigure 4.** Responder Analysis

**eFigure 5.** Preplanned Subgroup Analysis of Physical Function, as Measured by the EORTC QLQ-C30

**eFigure 6.** Responder Sensitivity Analysis

**eFigure 7.** Mean Changes From Baseline at Each Visit for Symptom Scales

This supplemental material has been provided by the authors to give readers additional information about their work.

**eTable 1. Patient-Reported Outcome (PRO) Weekly Survey Items and Alert Notification Criteria**

PRO-TECT weekly patient-reported outcome (PRO) survey: PRO survey items, sent weekly to participating PRO intervention arm patients via web or automated telephone interactive voice response (IVR) system, with associated verbiage for reports generated at clinic visits, and criteria for triggering real-time alerts to the care team. Alert thresholds are based on prior research and study advisory board consensus. Items 1, 2, and 4-10 are derived from the National Cancer Institute PRO-CTCAE item library. Item 3 is the patient version of ECOG performance status. Item 12 is from the COST-FACIT questionnaire. Items 11, 13, and 14 were developed for this trial.

| Question                                                                                      | Response Options                                                                                                                                       | Survey Skip Pattern Rules                                                                                                                                 | Language for Inclusion in Report at Clinic Visits                                                                                                      | Criteria for Inclusion in Real-Time Alert Notifications to Care Team                                                        |
|-----------------------------------------------------------------------------------------------|--------------------------------------------------------------------------------------------------------------------------------------------------------|-----------------------------------------------------------------------------------------------------------------------------------------------------------|--------------------------------------------------------------------------------------------------------------------------------------------------------|-----------------------------------------------------------------------------------------------------------------------------|
| 1. In the last 7 days, has your EATING and DRINKING DECREASED?                                | <ul style="list-style-type: none"> <li>• Not at all</li> <li>• A little bit</li> <li>• Somewhat</li> <li>• Quite a bit</li> <li>• Very much</li> </ul> |                                                                                                                                                           | Food/fluid Intake: Not at all, A little bit, Somewhat, Quite a bit, Very much                                                                          | Absolute score of Quite a bit or Very much; or change since prior questionnaire from Not at all to Somewhat or higher       |
| 2a. In the last 7 days, how OFTEN did you have PAIN?                                          | <ul style="list-style-type: none"> <li>• Never</li> <li>• Rarely</li> <li>• Occasionally</li> <li>• Frequently</li> <li>• Almost constantly</li> </ul> | If answered “Rarely”, “Occasionally”, “Frequently”, or “Almost constantly”, then answer questions 2b and 2c. If answered “Never”, then skip to question 3 | Pain Frequency: Never, Rarely, Occasionally, Frequently, Almost constantly                                                                             | Absolute score of Frequently or Almost constantly; or change since prior questionnaire from Never to Occasionally or higher |
| 2b. In the last 7 days, what was the SEVERITY of your PAIN at its WORST?                      | <ul style="list-style-type: none"> <li>• None</li> <li>• Mild</li> <li>• Moderate</li> <li>• Severe</li> <li>• Very severe</li> </ul>                  |                                                                                                                                                           | Pain Severity: None, Mild, Moderate, Severe, Very severe                                                                                               | Absolute score of Severe or Very severe; or change since prior questionnaire from None to Moderate or higher                |
| 2c. In the last 7 days, how much did your PAIN INTERFERE with your usual or daily activities? | <ul style="list-style-type: none"> <li>• Not at all</li> <li>• A little bit</li> <li>• Somewhat</li> <li>• Quite a bit</li> <li>• Very much</li> </ul> |                                                                                                                                                           | Pain Interference: Not at all, A little bit, Somewhat, Quite a bit, Very much                                                                          | Absolute score of Quite a bit or Very much; or change since prior questionnaire from Not at all to Somewhat or higher       |
| 3. In the last 7 days, how would you generally rate your ACTIVITY:                            | <ul style="list-style-type: none"> <li>• Normal with no limitations (0)</li> <li>• Not your normal self, but able to be up and about with</li> </ul>   |                                                                                                                                                           | Patient ECOG Performance Status: ECOG 0 (Fully Active), ECOG 1 (Cannot do strenuous activities but up and about most of the day and can do light house | Absolute score of ECOG 3 or ECOG 4; or worsened by 2 grade levels from prior questionnaire*                                 |

| Question                                                                                         | Response Options                                                                                                                                                                                                                                                                                                      | Survey Skip Pattern Rules                                                                                                                       | Language for Inclusion in Report at Clinic Visits                                                                                                                                        | Criteria for Inclusion in Real-Time Alert Notifications to Care Team                                                        |
|--------------------------------------------------------------------------------------------------|-----------------------------------------------------------------------------------------------------------------------------------------------------------------------------------------------------------------------------------------------------------------------------------------------------------------------|-------------------------------------------------------------------------------------------------------------------------------------------------|------------------------------------------------------------------------------------------------------------------------------------------------------------------------------------------|-----------------------------------------------------------------------------------------------------------------------------|
|                                                                                                  | <ul style="list-style-type: none"> <li>fairly normal activities (1)</li> <li>• Not feeling up to most things, but in bed or chair less than half the day (2)</li> <li>• Able to do little activity &amp; spend most of the day in bed or chair (3)</li> <li>• Pretty much bedridden, rarely out of bed (4)</li> </ul> |                                                                                                                                                 | work), ECOG 2 (Moderate impairment), ECOG 3 (Cannot do most house work, but able to take care of myself and am up and about more than half the day), ECOG 4 (Rarely or never out of bed) |                                                                                                                             |
| 4. In the last 7 days, how often have you been bothered by FEELING DOWN, DEPRESSED, OR HOPELESS? | <ul style="list-style-type: none"> <li>• Not at all</li> <li>• Several days</li> <li>• More than half the days</li> <li>• Nearly every day</li> </ul>                                                                                                                                                                 |                                                                                                                                                 | Depression: Not at all, Several days, More than half the days, Nearly every day                                                                                                          | Absolute score of More than half the days or Nearly every day                                                               |
| 5a. In the last 7 days, how OFTEN did you have NAUSEA?                                           | <ul style="list-style-type: none"> <li>• Never</li> <li>• Rarely</li> <li>• Occasionally</li> <li>• Frequently</li> <li>• Almost constantly</li> </ul>                                                                                                                                                                | If answered “Rarely”, “Occasionally”, “Frequently”, or “Almost constantly” then answer question 5b. If answered “Never” then skip to question 6 | Nausea Frequency: Never, Rarely, Occasionally, Frequently, Almost constantly                                                                                                             | Absolute score of Frequently or Almost constantly; or change since prior questionnaire from Never to Occasionally or higher |
| 5b. In the last 7 days, what was the SEVERITY of your NAUSEA at its WORST?                       | <ul style="list-style-type: none"> <li>• None</li> <li>• Mild</li> <li>• Moderate</li> <li>• Severe</li> <li>• Very severe</li> </ul>                                                                                                                                                                                 |                                                                                                                                                 | Nausea Severity: None, Mild, Moderate, Severe, Very severe                                                                                                                               | Absolute score of Severe or Very severe; or change since prior questionnaire from None to Moderate or higher                |
| 6. In the last 7 days, how OFTEN did you have VOMITING?                                          | <ul style="list-style-type: none"> <li>• Never</li> <li>• Rarely</li> <li>• Occasionally</li> <li>• Frequently</li> <li>• Almost constantly</li> </ul>                                                                                                                                                                |                                                                                                                                                 | Vomiting: Never, Rarely, Occasionally, Frequently, Almost constantly                                                                                                                     | Absolute score of Frequently or Almost constantly; or change since prior questionnaire from Never to Occasionally or higher |

| Question                                                                                                                                                   | Response Options                                                                                                                                       | Survey Skip Pattern Rules                                                                                                       | Language for Inclusion in Report at Clinic Visits                                | Criteria for Inclusion in Real-Time Alert Notifications to Care Team                                                        |
|------------------------------------------------------------------------------------------------------------------------------------------------------------|--------------------------------------------------------------------------------------------------------------------------------------------------------|---------------------------------------------------------------------------------------------------------------------------------|----------------------------------------------------------------------------------|-----------------------------------------------------------------------------------------------------------------------------|
| 7. In the last 7 days, how OFTEN did you have LOOSE OR WATERY STOOLS (DIARRHEA)?                                                                           | <ul style="list-style-type: none"> <li>• Never</li> <li>• Rarely</li> <li>• Occasionally</li> <li>• Frequently</li> <li>• Almost constantly</li> </ul> |                                                                                                                                 | Diarrhea: Never, Rarely, Occasionally, Frequently, Almost constantly             | Absolute score of Frequently or Almost constantly; or change since prior questionnaire from Never to Occasionally or higher |
| 8. In the last 7 days, what was the SEVERITY of your CONSTIPATION at its WORST?                                                                            | <ul style="list-style-type: none"> <li>• None</li> <li>• Mild</li> <li>• Moderate</li> <li>• Severe</li> <li>• Very severe</li> </ul>                  |                                                                                                                                 | Constipation: None, Mild, Moderate, Severe, Very severe                          | Absolute score of Severe or Very severe; or change since prior questionnaire from None to Moderate or higher                |
| 9a. In the last 7 days, what was the SEVERITY of your SHORTNESS OF BREATH at its WORST?                                                                    | <ul style="list-style-type: none"> <li>• None</li> <li>• Mild</li> <li>• Moderate</li> <li>• Severe</li> <li>• Very severe</li> </ul>                  | If answered “Mild”, “Moderate”, “Severe”, or “Very Severe” then answer question 9b. If answered “None” then skip to question 10 | Dyspnea Severity: None, Mild, Moderate, Severe, Very severe                      | Absolute score of Severe or Very severe; or change since prior questionnaire from None to Moderate or higher                |
| 9b. In the last 7 days, how much did your SHORTNESS OF BREATH INTERFERE with your usual or daily activities?                                               | <ul style="list-style-type: none"> <li>• Not at all</li> <li>• A little bit</li> <li>• Somewhat</li> <li>• Quite a bit</li> <li>• Very much</li> </ul> |                                                                                                                                 | Dyspnea Interference: Not at All, A little bit, Somewhat, Quite a bit, Very much | Absolute score of Quite a bit or Very much; or change since prior questionnaire from Not at all to Somewhat or higher       |
| 10. In the last 7 days, what was the SEVERITY of your INSOMNIA (including difficulty falling asleep, staying asleep, or waking up too early) at its WORST? | <ul style="list-style-type: none"> <li>• None</li> <li>• Mild</li> <li>• Moderate</li> <li>• Severe</li> <li>• Very severe</li> </ul>                  |                                                                                                                                 | Insomnia: None, Mild, Moderate, Severe, Very severe                              | Absolute score of Severe or Very severe; or change since prior questionnaire from None to Moderate or higher                |
| 11. In the last 7 days, have you fallen?                                                                                                                   | <ul style="list-style-type: none"> <li>• No</li> <li>• Yes</li> </ul>                                                                                  |                                                                                                                                 | Falls: No, Yes                                                                   | Yes                                                                                                                         |
| 12. In the last month, my illness has been a financial hardship to my family and me.                                                                       | <ul style="list-style-type: none"> <li>• Not at all</li> <li>• A little bit</li> <li>• Somewhat</li> <li>• Quite a bit</li> <li>• Very much</li> </ul> | Note: Question was added to survey in March 2019. Question appeared every 4 weeks.                                              | Not listed on report                                                             | Absolute score of Quite a bit or Very much                                                                                  |

| Question                                                                                                                                      | Response Options                                                                                                                                                                                         | Survey Skip Pattern Rules | Language for Inclusion in Report at Clinic Visits                                                                                    | Criteria for Inclusion in Real-Time Alert Notifications to Care Team                                                                                                                                                                                                           |
|-----------------------------------------------------------------------------------------------------------------------------------------------|----------------------------------------------------------------------------------------------------------------------------------------------------------------------------------------------------------|---------------------------|--------------------------------------------------------------------------------------------------------------------------------------|--------------------------------------------------------------------------------------------------------------------------------------------------------------------------------------------------------------------------------------------------------------------------------|
| 13. Do you have any other symptoms that are interfering with your daily activities that you would like to discuss with your cancer care team? | <ul style="list-style-type: none"> <li>• Prefer not to answer</li> <li>• No</li> <li>• Yes (please list below)</li> </ul>                                                                                |                           | Other Symptoms: if patient reports by web, text from free text box; if patient reports by IVR, simply report patient responded “Yes” | If response is “Yes” for IVR or “Yes” and/or text in the text box for web, then response triggers alert to cancer care team. If patient reports by web, then text from text box is forwarded; if IVR, alert indicates the patient responded “Yes” (no text-to-speech capacity) |
| 14. Who completed this survey?                                                                                                                | <ul style="list-style-type: none"> <li>• Myself (the patient)</li> <li>• Caregiver (family member, friend, or professional helper)</li> <li>• Research staff</li> <li>• Other, please specify</li> </ul> |                           | Not listed on report (question is for research purposes)                                                                             | Not applicable                                                                                                                                                                                                                                                                 |

\* Alerts were initially triggered by an ECOG score worsening by 1-point, but due to a large number of resulting alerts, as well as feedback from practice nurses of limited perceived usefulness of these alerts, plus data showing that nurses did not act on these 1-point worsening alerts, and deliberation by the trial’s multidisciplinary Advisory Board and patient representatives, the threshold was changed on March 21, 2018 to triggering by a 2-point worsening.

**eTable 2.** Subgroup Analysis Variables

**Age**

- Age <60
- Age ≥60

**Sex**

- Male
- Female

**Race**

- White
- Non-white

**Ethnicity**

- Hispanic
- Non-Hispanic

**Education**

- ≤High school
- ≥Some college

**Employment status**

- Working
- Not currently working

**Marital status**

- Married/partnered
- Other

**Device use**

- Inexperienced
- Experienced

**Internet use**

- Inexperienced
- Experienced

**Email use**

- Inexperienced
- Experienced

**Site location**

- Urban/Suburban
- Rural

**Cancer type**

- Thoracic
- Breast
- Colorectal
- GU
- Gynecologic
- Other

**eTable 3. Roster of Participating Practices, Locations, Allocations, and Patient Accrual**

Roster of participating community oncology practice (cluster) locations, and respective study arm allocations, patient enrollment, rurality, geographic region, and proportion of enrolled patients who are Black/African American. Rurality is based on 2010 US Census data, confirmed with practice self-designation. Geographic region of practices is based on the Geographic Management of Cancer Health Disparities Program (GMaP) designations (<https://www.cancer.gov/about-nci/organization/crhd/inp/gmap>).

| Community Oncology Practice # (Cluster) | Site Location  | # of Sites of Service | Study Arm | # of Patients enrolled | Practice Rurality (Census)* | GMaP Region | Black/African American $\geq$ 20%** |
|-----------------------------------------|----------------|-----------------------|-----------|------------------------|-----------------------------|-------------|-------------------------------------|
| 101                                     | Iowa           | 1                     | PROs      | 10                     | Urban                       | 4           | No                                  |
| 102                                     | Pennsylvania   | 4                     | PROs      | 48                     | Urban                       | 4           | No                                  |
| 103                                     | New Hampshire  | 2                     | PROs      | 31                     | Rural                       | 1N          | No                                  |
| 104                                     | Illinois       | 3                     | Control   | 32                     | Urban                       | 4           | No                                  |
| 105                                     | Illinois       | 3                     | PROs      | 31                     | Rural                       | 4           | No                                  |
| 106                                     | Missouri       | 1                     | PROs      | 19                     | Urban                       | 2           | No                                  |
| 107                                     | Iowa           | 1                     | PROs      | 19                     | Urban                       | 4           | No                                  |
| 108                                     | Montana        | 1                     | Control   | 11                     | Urban                       | 6           | No                                  |
| 109                                     | Montana        | 1                     | Control   | 3                      | Urban                       | 6           | No                                  |
| 110                                     | Michigan       | 2                     | Control   | 34                     | Urban                       | 4           | No                                  |
| 111                                     | Michigan       | 5                     | PROs      | 23                     | Urban                       | 4           | Yes                                 |
| 112                                     | Massachusetts  | 1                     | Control   | 12                     | Urban                       | 4           | No                                  |
| 113                                     | Wisconsin      | 2                     | Control   | 26                     | Urban                       | 4           | No                                  |
| 114                                     | New York       | 1                     | PROs      | 30                     | Urban                       | 4           | No                                  |
| 115                                     | Missouri       | 1                     | Control   | 22                     | Rural                       | 2           | No                                  |
| 116                                     | Michigan       | 1                     | PROs      | 10                     | Urban                       | 4           | Yes                                 |
| 117                                     | Ohio           | 3                     | Control   | 31                     | Rural                       | 4           | No                                  |
| 118                                     | Missouri       | 1                     | PROs      | 12                     | Rural                       | 2           | No                                  |
| 119                                     | Minnesota      | 3                     | Control   | 25                     | Urban                       | 4           | No                                  |
| 120                                     | Minnesota      | 4                     | PROs      | 25                     | Urban                       | 4           | No                                  |
| 121                                     | Minnesota      | 3                     | Control   | 25                     | Urban                       | 4           | No                                  |
| 122                                     | Minnesota      | 3                     | PROs      | 21                     | Urban                       | 4           | No                                  |
| 123                                     | North Carolina | 2                     | Control   | 25                     | Rural                       | 1S          | Yes                                 |
| 124                                     | Indiana        | 2                     | Control   | 27                     | Urban                       | 4           | No                                  |
| 125                                     | Indiana        | 1                     | PROs      | 2                      | Rural                       | 4           | No                                  |
| 126                                     | Maryland       | 1                     | Control   | 24                     | Urban                       | 1N          | No                                  |
| 127                                     | Nevada         | 4                     | PROs      | 35                     | Urban                       | 6           | No                                  |
| 128                                     | Virginia       | 1                     | PROs      | 50                     | Urban                       | 1N          | No                                  |
| 129                                     | West Virginia  | 1                     | Control   | 13                     | Rural                       | 1N          | No                                  |
| 130                                     | Illinois       | 2                     | PROs      | 39                     | Rural                       | 4           | No                                  |
| 131                                     | Illinois       | 2                     | Control   | 19                     | Urban                       | 4           | No                                  |
| 132                                     | Indiana        | 1                     | PROs      | 20                     | Urban                       | 4           | No                                  |
| 133                                     | Maine          | 1                     | Control   | 32                     | Rural                       | 1N          | No                                  |
| 134                                     | South Dakota   | 1                     | PROs      | 19                     | Rural                       | 6           | No                                  |
| 135                                     | Rhode Island   | 1                     | Control   | 20                     | Urban                       | 4           | No                                  |
| 136                                     | North Carolina | 1                     | Control   | 24                     | Urban                       | 1S          | Yes                                 |
| 137                                     | Illinois       | 1                     | PROs      | 19                     | Urban                       | 4           | Yes                                 |
| 138                                     | Maryland       | 1                     | Control   | 35                     | Urban                       | 1N          | No                                  |

|     |                |   |         |    |       |    |     |
|-----|----------------|---|---------|----|-------|----|-----|
| 139 | Nebraska       | 1 | PROs    | 30 | Urban | 3  | No  |
| 140 | Colorado       | 1 | Control | 20 | Rural | 3  | No  |
| 141 | North Carolina | 1 | PROs    | 20 | Rural | 1S | Yes |
| 142 | Illinois       | 1 | Control | 20 | Rural | 4  | No  |
| 143 | Georgia        | 4 | Control | 42 | Urban | 2  | Yes |
| 144 | North Carolina | 5 | PROs    | 35 | Urban | 1S | Yes |
| 145 | Wisconsin      | 2 | Control | 13 | Urban | 4  | No  |
| 146 | Pennsylvania   | 2 | PROs    | 14 | Urban | 4  | Yes |
| 147 | Maryland       | 1 | PROs    | 5  | Urban | 1N | Yes |
| 148 | Iowa           | 1 | Control | 25 | Urban | 4  | No  |
| 149 | Nebraska       | 1 | Control | 20 | Urban | 3  | No  |
| 150 | Wisconsin      | 4 | PROs    | 22 | Urban | 4  | No  |
| 151 | Texas          | 2 | PROs    | 4  | Urban | 3  | Yes |
| 152 | New York       | 1 | Control | 18 | Urban | 4  | Yes |

*GMaP, Geographic Management of Cancer Health Disparities Program designations*

*(<https://www.cancer.gov/about-nci/organization/crhd/inp/qmap>)*

\* Based on 2010 US Census data (County Rurality Census Table), confirmed with practice self-designation.

\*\* Based on practice self-report.



**eTable 4. Intracluster Correlation Coefficient for Each Patient-Reported Outcome Endpoint**

The intracluster correlation coefficient was estimated at month 3 using a general linear mixed model of each patient-reported outcome endpoint which included a fixed effect for arm and a random effect for cluster. The original statistical design conservatively assumed an intracluster correlation coefficient of 0.055 for physical function, which was identified as a co-primary endpoint with overall survival.

| <b>Patient-reported outcome endpoint</b> | <b>Intracluster correlation coefficient</b> |
|------------------------------------------|---------------------------------------------|
| Physical functioning                     | 0.020                                       |
| Role functioning                         | 0.002                                       |
| Emotional functioning                    | 0.039                                       |
| Cognitive functioning                    | 0.021                                       |
| Social functioning                       | 0.028                                       |
| Global health status/quality of life     | 0.031                                       |
| Fatigue                                  | 0.016                                       |
| Nausea/vomiting                          | <0.001                                      |
| Pain                                     | <0.001                                      |
| Dyspnea                                  | 0.016                                       |
| Insomnia                                 | 0.002                                       |
| Appetite loss                            | <0.001                                      |
| Constipation                             | <0.001                                      |
| Diarrhea                                 | 0.024                                       |
| Financial concerns                       | 0.015                                       |
| Health-related quality of life           | 0.021                                       |
| Symptom control                          | 0.014                                       |

**eTable 5. Physical Function, Symptom Control, and Health-Related Quality of Life Mean Score Estimates and Differences in Mean Changes From Baseline Between Arms at Each Visit**

Physical function is tabulated from 5 dedicated items in the EORTC QLQ-C30 questionnaire. Symptom control is tabulated from symptom scales of the QLQ-C30. Health-related quality of life is tabulated from functioning and symptom scales of the QLQ-C30. All tabulations are based on published scoring procedures.

| Outcome Scale                  | Timepoint | PRO Arm Mean Estimate | Control Arm Mean Estimate | Difference in Mean Change from Baseline between Groups (95% CI) | P-value of Difference between Groups |
|--------------------------------|-----------|-----------------------|---------------------------|-----------------------------------------------------------------|--------------------------------------|
| Physical Function              | Baseline  | 74.27                 | 73.54                     | -                                                               | N/A                                  |
|                                | Month 1   | 76.63                 | 74.62                     | 1.28 (-0.73, 3.29)                                              | 0.21                                 |
|                                | Month 3   | 75.81                 | 72.61                     | 2.47 (0.41, 4.53)                                               | 0.02                                 |
|                                | Month 6   | 75.21                 | 71.15                     | 3.33 (1.16, 5.51)                                               | 0.003                                |
|                                | Month 9   | 73.15                 | 69.69                     | 2.74 (0.41, 5.07)                                               | 0.02                                 |
|                                | Month 12  | 71.26                 | 70.01                     | 0.52 (-1.94, 2.98)                                              | 0.68                                 |
| Symptom Control                | Baseline  | 77.67                 | 76.75                     | -                                                               | N/A                                  |
|                                | Month 1   | 79.91                 | 76.63                     | 2.36 (0.79, 3.93)                                               | 0.003                                |
|                                | Month 3   | 80.03                 | 76.55                     | 2.56 (0.95, 4.17)                                               | 0.002                                |
|                                | Month 6   | 79.28                 | 76.30                     | 2.06 (0.37, 3.76)                                               | 0.02                                 |
|                                | Month 9   | 78.59                 | 75.81                     | 1.86 (0.04, 3.67)                                               | 0.045                                |
|                                | Month 12  | 77.33                 | 75.43                     | 0.98 (-0.94, 2.90)                                              | 0.32                                 |
| Health-Related Quality of Life | Baseline  | 78.11                 | 77.00                     | -                                                               | N/A                                  |
|                                | Month 1   | 80.52                 | 77.18                     | 2.24 (0.75, 3.74)                                               | 0.003                                |
|                                | Month 3   | 80.03                 | 76.50                     | 2.43 (0.90, 3.96)                                               | 0.002                                |
|                                | Month 6   | 79.48                 | 76.13                     | 2.25 (0.63, 3.86)                                               | 0.006                                |
|                                | Month 9   | 78.42                 | 75.37                     | 1.94 (0.21, 3.67)                                               | 0.03                                 |
|                                | Month 12  | 77.47                 | 75.26                     | 1.10 (-0.72, 2.93)                                              | 0.24                                 |

**eTable 6. Proportion of Patients in the Patient-Reported Outcome (PRO) Intervention Arm and Control Arm With 5-Point and 10-Point Changes in Physical Function, Symptom Control, and Health-Related Quality of Life**

**eTable 6A.** Proportion of patients in the patient-reported outcome (PRO) intervention arm and control arm with 5-point improvement or worsening in physical function compared to baseline, as measured by the EORTC QLQ-C30, at each assessment timepoint.

|                                    | PRO Intervention (N=593) | Control (N=598) | Total (N=1191) | P-Value |
|------------------------------------|--------------------------|-----------------|----------------|---------|
| <b>Physical Function, Month 1</b>  |                          |                 |                | 0.10    |
| Missing                            | 20                       | 13              | 33             |         |
| N/A: Off-Study                     | 7 (0.0%)                 | 13 (0.0%)       | 20 (0.0%)      |         |
| Responder Improving (+5)           | 247 (43.6%)              | 215 (37.6%)     | 462 (40.6%)    |         |
| Non-Responder                      | 148 (26.1%)              | 169 (29.5%)     | 317 (27.9%)    |         |
| Responder Worsening (-5)           | 171 (30.2%)              | 188 (32.9%)     | 359 (31.5%)    |         |
|                                    |                          |                 |                |         |
| <b>Physical Function, Month 3</b>  |                          |                 |                | 0.009   |
| Missing                            | 20                       | 12              | 32             |         |
| N/A: Off-Study                     | 51 (0.0%)                | 42 (0.0%)       | 93 (0.0%)      |         |
| Responder Improving (+5)           | 227 (43.5%)              | 195 (35.8%)     | 422 (39.6%)    |         |
| Non-Responder                      | 133 (25.5%)              | 147 (27.0%)     | 280 (26.3%)    |         |
| Responder Worsening (-5)           | 162 (31.0%)              | 202 (37.1%)     | 364 (34.1%)    |         |
|                                    |                          |                 |                |         |
| <b>Physical Function, Month 6</b>  |                          |                 |                | 0.004   |
| Missing                            | 23                       | 22              | 45             |         |
| N/A: Off-Study                     | 126 (0.0%)               | 112 (0.0%)      | 238 (0.0%)     |         |
| Responder Improving (+5)           | 180 (40.5%)              | 152 (32.8%)     | 332 (36.6%)    |         |
| Non-Responder                      | 120 (27.0%)              | 119 (25.6%)     | 239 (26.3%)    |         |
| Responder Worsening (-5)           | 144 (32.4%)              | 193 (41.6%)     | 337 (37.1%)    |         |
|                                    |                          |                 |                |         |
| <b>Physical Function, Month 9</b>  |                          |                 |                | 0.11    |
| Missing                            | 24                       | 21              | 45             |         |
| N/A: Off-Study                     | 220 (0.0%)               | 179 (0.0%)      | 399 (0.0%)     |         |
| Responder Improving (+5)           | 129 (37.0%)              | 133 (33.4%)     | 262 (35.1%)    |         |
| Non-Responder                      | 92 (26.4%)               | 92 (23.1%)      | 184 (24.6%)    |         |
| Responder Worsening (-5)           | 128 (36.7%)              | 173 (43.5%)     | 301 (40.3%)    |         |
|                                    |                          |                 |                |         |
| <b>Physical Function, Month 12</b> |                          |                 |                | 0.22    |
| Missing                            | 20                       | 26              | 46             |         |
| N/A: Off-Study                     | 278 (0.0%)               | 230 (0.0%)      | 508 (0.0%)     |         |

|                          | <b>PRO<br/>Intervention<br/>(N=593)</b> | <b>Control<br/>(N=598)</b> | <b>Total<br/>(N=1191)</b> | <b>P-Value</b> |
|--------------------------|-----------------------------------------|----------------------------|---------------------------|----------------|
| Responder Improving (+5) | 120 (40.7%)                             | 120 (35.1%)                | 240 (37.7%)               |                |
| Non-Responder            | 67 (22.7%)                              | 76 (22.2%)                 | 143 (22.4%)               |                |
| Responder Worsening (-5) | 108 (36.6%)                             | 146 (42.7%)                | 254 (39.9%)               |                |

**eTable 6B.** Proportion of patients in the patient-reported outcome (PRO) intervention arm and control arm with 10-point improvement or worsening in physical function compared to baseline, as measured by the EORTC QLQ-C30, at each assessment timepoint.

|                                    | PRO Intervention (N=593) | Control (N=598) | Total (N=1191) | P-Value |
|------------------------------------|--------------------------|-----------------|----------------|---------|
| <b>Physical Function, Month 1</b>  |                          |                 |                | 0.48    |
| Missing                            | 20                       | 13              | 33             |         |
| N/A: Off-Study                     | 7 (0.0%)                 | 13 (0.0%)       | 20 (0.0%)      |         |
| Responder Improving (+10)          | 138 (24.4%)              | 134 (23.4%)     | 272 (23.9%)    |         |
| Non-Responder                      | 349 (61.7%)              | 347 (60.7%)     | 696 (61.2%)    |         |
| Responder Worsening (-10)          | 79 (14.0%)               | 91 (15.9%)      | 170 (14.9%)    |         |
|                                    |                          |                 |                |         |
| <b>Physical Function, Month 3</b>  |                          |                 |                | 0.007   |
| Missing                            | 20                       | 12              | 32             |         |
| N/A: Off-Study                     | 51 (0.0%)                | 42 (0.0%)       | 93 (0.0%)      |         |
| Responder Improving (+10)          | 135 (25.9%)              | 109 (20.0%)     | 244 (22.9%)    |         |
| Non-Responder                      | 294 (56.3%)              | 304 (55.9%)     | 598 (56.1%)    |         |
| Responder Worsening (-10)          | 93 (17.8%)               | 131 (24.1%)     | 224 (21.0%)    |         |
|                                    |                          |                 |                |         |
| <b>Physical Function, Month 6</b>  |                          |                 |                | <0.001  |
| Missing                            | 23                       | 22              | 45             |         |
| N/A: Off-Study                     | 126 (0.0%)               | 112 (0.0%)      | 238 (0.0%)     |         |
| Responder Improving (+10)          | 113 (25.5%)              | 82 (17.7%)      | 195 (21.5%)    |         |
| Non-Responder                      | 246 (55.4%)              | 260 (56.0%)     | 506 (55.7%)    |         |
| Responder Worsening (-10)          | 85 (19.1%)               | 122 (26.3%)     | 207 (22.8%)    |         |
|                                    |                          |                 |                |         |
| <b>Physical Function, Month 9</b>  |                          |                 |                | 0.05    |
| Missing                            | 24                       | 21              | 45             |         |
| N/A: Off-Study                     | 220 (0.0%)               | 179 (0.0%)      | 399 (0.0%)     |         |
| Responder Improving (+10)          | 81 (23.2%)               | 76 (19.1%)      | 157 (21.0%)    |         |
| Non-Responder                      | 193 (55.3%)              | 215 (54.0%)     | 408 (54.6%)    |         |
| Responder Worsening (-10)          | 75 (21.5%)               | 107 (26.9%)     | 182 (24.4%)    |         |
|                                    |                          |                 |                |         |
| <b>Physical Function, Month 12</b> |                          |                 |                | 0.59    |
| Missing                            | 20                       | 26              | 46             |         |
| N/A: Off-Study                     | 278 (0.0%)               | 230 (0.0%)      | 508 (0.0%)     |         |
| Responder Improving (+10)          | 65 (22.0%)               | 65 (19.0%)      | 130 (20.4%)    |         |
| Non-Responder                      | 159 (53.9%)              | 188 (55.0%)     | 347 (54.5%)    |         |
| Responder Worsening (-10)          | 71 (24.1%)               | 89 (26.0%)      | 160 (25.1%)    |         |

**eTable 6C.** Proportion of patients in the patient-reported outcome (PRO) intervention arm and control arm with 5-point improvement or worsening in symptom control compared to baseline, as measured by the EORTC QLQ-C30, at each assessment timepoint.

|                                  | PRO Intervention (N=593) | Control (N=598) | Total (N=1191) | P-Value |
|----------------------------------|--------------------------|-----------------|----------------|---------|
| <b>Symptom control, Month 1</b>  |                          |                 |                | 0.002   |
| Missing                          | 20                       | 16              | 36             |         |
| N/A: Off-Study                   | 7 (0.0%)                 | 13 (0.0%)       | 20 (0.0%)      |         |
| Responder Improving (+5)         | 208 (36.7%)              | 149 (26.2%)     | 357 (31.5%)    |         |
| Non-Responder                    | 227 (40.1%)              | 266 (46.7%)     | 493 (43.4%)    |         |
| Responder Worsening (-5)         | 131 (23.1%)              | 154 (27.1%)     | 285 (25.1%)    |         |
|                                  |                          |                 |                |         |
| <b>Symptom control, Month 3</b>  |                          |                 |                | 0.003   |
| Missing                          | 25                       | 13              | 38             |         |
| N/A: Off-Study                   | 51 (0.0%)                | 42 (0.0%)       | 93 (0.0%)      |         |
| Responder Improving (+5)         | 195 (37.7%)              | 158 (29.1%)     | 353 (33.3%)    |         |
| Non-Responder                    | 199 (38.5%)              | 215 (39.6%)     | 414 (39.1%)    |         |
| Responder Worsening (-5)         | 123 (23.8%)              | 170 (31.3%)     | 293 (27.6%)    |         |
|                                  |                          |                 |                |         |
| <b>Symptom control, Month 6</b>  |                          |                 |                | 0.006   |
| Missing                          | 25                       | 23              | 48             |         |
| N/A: Off-Study                   | 126 (0.0%)               | 112 (0.0%)      | 238 (0.0%)     |         |
| Responder Improving (+5)         | 160 (36.2%)              | 139 (30.0%)     | 299 (33.0%)    |         |
| Non-Responder                    | 168 (38.0%)              | 169 (36.5%)     | 337 (37.2%)    |         |
| Responder Worsening (-5)         | 114 (25.8%)              | 155 (33.5%)     | 269 (29.7%)    |         |
|                                  |                          |                 |                |         |
| <b>Symptom control, Month 9</b>  |                          |                 |                | 0.03    |
| Missing                          | 25                       | 23              | 48             |         |
| N/A: Off-Study                   | 220 (0.0%)               | 179 (0.0%)      | 399 (0.0%)     |         |
| Responder Improving (+5)         | 124 (35.6%)              | 123 (31.1%)     | 247 (33.2%)    |         |
| Non-Responder                    | 128 (36.8%)              | 132 (33.3%)     | 260 (34.9%)    |         |
| Responder Worsening (-5)         | 96 (27.6%)               | 141 (35.6%)     | 237 (31.9%)    |         |
|                                  |                          |                 |                |         |
| <b>Symptom control, Month 12</b> |                          |                 |                | 0.59    |
| Missing                          | 21                       | 27              | 48             |         |
| N/A: Off-Study                   | 278 (0.0%)               | 230 (0.0%)      | 508 (0.0%)     |         |
| Responder Improving (+5)         | 94 (32.0%)               | 117 (34.3%)     | 211 (33.2%)    |         |
| Non-Responder                    | 123 (41.8%)              | 111 (32.6%)     | 234 (36.9%)    |         |
| Responder Worsening (-5)         | 77 (26.2%)               | 113 (33.1%)     | 190 (29.9%)    |         |

**eTable 6D.** Proportion of patients in the patient-reported outcome (PRO) intervention arm and control arm with 10-point improvement or worsening in symptom control compared to baseline, as measured by the EORTC QLQ-C30, at each assessment timepoint.

|                                  | PRO Intervention (N=593) | Control (N=598) | Total (N=1191) | P-Value |
|----------------------------------|--------------------------|-----------------|----------------|---------|
| <b>Symptom control, Month 1</b>  |                          |                 |                | 0.003   |
| Missing                          | 20                       | 16              | 36             |         |
| N/A: Off-Study                   | 7 (0.0%)                 | 13 (0.0%)       | 20 (0.0%)      |         |
| Responder Improving (+10)        | 119 (21.0%)              | 84 (14.8%)      | 203 (17.9%)    |         |
| Non-Responder                    | 378 (66.8%)              | 394 (69.2%)     | 772 (68.0%)    |         |
| Responder Worsening (-10)        | 69 (12.2%)               | 91 (16.0%)      | 160 (14.1%)    |         |
|                                  |                          |                 |                |         |
| <b>Symptom control, Month 3</b>  |                          |                 |                | 0.004   |
| Missing                          | 25                       | 13              | 38             |         |
| N/A: Off-Study                   | 51 (0.0%)                | 42 (0.0%)       | 93 (0.0%)      |         |
| Responder Improving (+10)        | 118 (22.8%)              | 101 (18.6%)     | 219 (20.7%)    |         |
| Non-Responder                    | 331 (64.0%)              | 331 (61.0%)     | 662 (62.5%)    |         |
| Responder Worsening (-10)        | 68 (13.2%)               | 111 (20.4%)     | 179 (16.9%)    |         |
|                                  |                          |                 |                |         |
| <b>Symptom control, Month 6</b>  |                          |                 |                | 0.02    |
| Missing                          | 25                       | 23              | 48             |         |
| N/A: Off-Study                   | 126 (0.0%)               | 112 (0.0%)      | 238 (0.0%)     |         |
| Responder Improving (+10)        | 91 (20.6%)               | 87 (18.8%)      | 178 (19.7%)    |         |
| Non-Responder                    | 286 (64.7%)              | 273 (59.0%)     | 559 (61.8%)    |         |
| Responder Worsening (-10)        | 65 (14.7%)               | 103 (22.2%)     | 168 (18.6%)    |         |
|                                  |                          |                 |                |         |
| <b>Symptom control, Month 9</b>  |                          |                 |                | 0.19    |
| Missing                          | 25                       | 23              | 48             |         |
| N/A: Off-Study                   | 220 (0.0%)               | 179 (0.0%)      | 399 (0.0%)     |         |
| Responder Improving (+10)        | 67 (19.3%)               | 72 (18.2%)      | 139 (18.7%)    |         |
| Non-Responder                    | 222 (63.8%)              | 238 (60.1%)     | 460 (61.8%)    |         |
| Responder Worsening (-10)        | 59 (17.0%)               | 86 (21.7%)      | 145 (19.5%)    |         |
|                                  |                          |                 |                |         |
| <b>Symptom control, Month 12</b> |                          |                 |                | 0.63    |
| Missing                          | 21                       | 27              | 48             |         |
| N/A: Off-Study                   | 278 (0.0%)               | 230 (0.0%)      | 508 (0.0%)     |         |
| Responder Improving (+10)        | 56 (19.0%)               | 67 (19.6%)      | 123 (19.4%)    |         |
| Non-Responder                    | 183 (62.2%)              | 200 (58.7%)     | 383 (60.3%)    |         |
| Responder Worsening (-10)        | 55 (18.7%)               | 74 (21.7%)      | 129 (20.3%)    |         |

**eTable 6E.** Proportion of patients in the patient-reported outcome (PRO) intervention arm and control arm with 5-point improvement or worsening in health-related quality of life compared to baseline, as measured by the EORTC QLQ-C30, at each assessment timepoint.

|                                                 | PRO Intervention (N=593) | Control (N=598) | Total (N=1191) | P-Value |
|-------------------------------------------------|--------------------------|-----------------|----------------|---------|
| <b>Health-related quality of life, Month 1</b>  |                          |                 |                | <0.001  |
| Missing                                         | 22                       | 16              | 38             |         |
| N/A: Off-Study                                  | 7 (0.0%)                 | 13 (0.0%)       | 20 (0.0%)      |         |
| Responder Improving (+5)                        | 196 (34.8%)              | 144 (25.3%)     | 340 (30.0%)    |         |
| Non-Responder                                   | 256 (45.4%)              | 278 (48.9%)     | 534 (47.1%)    |         |
| Responder Worsening (-5)                        | 112 (19.9%)              | 147 (25.8%)     | 259 (22.9%)    |         |
|                                                 |                          |                 |                |         |
| <b>Health-related quality of life, Month 3</b>  |                          |                 |                | 0.006   |
| Missing                                         | 25                       | 13              | 38             |         |
| N/A: Off-Study                                  | 51 (0.0%)                | 42 (0.0%)       | 93 (0.0%)      |         |
| Responder Improving (+5)                        | 191 (36.9%)              | 154 (28.4%)     | 345 (32.5%)    |         |
| Non-Responder                                   | 199 (38.5%)              | 229 (42.2%)     | 428 (40.4%)    |         |
| Responder Worsening (-5)                        | 127 (24.6%)              | 160 (29.5%)     | 287 (27.1%)    |         |
|                                                 |                          |                 |                |         |
| <b>Health-related quality of life, Month 6</b>  |                          |                 |                | 0.003   |
| Missing                                         | 25                       | 23              | 48             |         |
| N/A: Off-Study                                  | 126 (0.0%)               | 112 (0.0%)      | 238 (0.0%)     |         |
| Responder Improving (+5)                        | 146 (33.0%)              | 128 (27.6%)     | 274 (30.3%)    |         |
| Non-Responder                                   | 188 (42.5%)              | 178 (38.4%)     | 366 (40.4%)    |         |
| Responder Worsening (-5)                        | 108 (24.4%)              | 157 (33.9%)     | 265 (29.3%)    |         |
|                                                 |                          |                 |                |         |
| <b>Health-related quality of life, Month 9</b>  |                          |                 |                | 0.04    |
| Missing                                         | 25                       | 23              | 48             |         |
| N/A: Off-Study                                  | 220 (0.0%)               | 179 (0.0%)      | 399 (0.0%)     |         |
| Responder Improving (+5)                        | 111 (31.9%)              | 115 (29.0%)     | 226 (30.4%)    |         |
| Non-Responder                                   | 148 (42.5%)              | 143 (36.1%)     | 291 (39.1%)    |         |
| Responder Worsening (-5)                        | 89 (25.6%)               | 138 (34.8%)     | 227 (30.5%)    |         |
|                                                 |                          |                 |                |         |
| <b>Health-related quality of life, Month 12</b> |                          |                 |                | 0.52    |
| Missing                                         | 22                       | 27              | 49             |         |
| N/A: Off-Study                                  | 278 (0.0%)               | 230 (0.0%)      | 508 (0.0%)     |         |
| Responder Improving (+5)                        | 88 (30.0%)               | 103 (30.2%)     | 191 (30.1%)    |         |
| Non-Responder                                   | 130 (44.4%)              | 127 (37.2%)     | 257 (40.5%)    |         |
| Responder Worsening (-5)                        | 75 (25.6%)               | 111 (32.6%)     | 186 (29.3%)    |         |



**eTable 6F.** Proportion of patients in the patient-reported outcome (PRO) intervention arm and control arm with 10-point improvement or worsening in health-related quality of life compared to baseline, as measured by the EORTC QLQ-C30, at each assessment timepoint.

|                                                 | PRO Intervention (N=593) | Control (N=598) | Total (N=1191) | P-Value |
|-------------------------------------------------|--------------------------|-----------------|----------------|---------|
| <b>Health-related quality of life, Month 1</b>  |                          |                 |                | 0.01    |
| Missing                                         | 22                       | 16              | 38             |         |
| N/A: Off-Study                                  | 7 (0.0%)                 | 13 (0.0%)       | 20 (0.0%)      |         |
| Responder Improving (+10)                       | 108 (19.1%)              | 72 (12.7%)      | 180 (15.9%)    |         |
| Non-Responder                                   | 397 (70.4%)              | 430 (75.6%)     | 827 (73.0%)    |         |
| Responder Worsening (-10)                       | 59 (10.5%)               | 67 (11.8%)      | 126 (11.1%)    |         |
|                                                 |                          |                 |                |         |
| <b>Health-related quality of life, Month 3</b>  |                          |                 |                | <0.001  |
| Missing                                         | 25                       | 13              | 38             |         |
| N/A: Off-Study                                  | 51 (0.0%)                | 42 (0.0%)       | 93 (0.0%)      |         |
| Responder Improving (+10)                       | 103 (19.9%)              | 79 (14.5%)      | 182 (17.2%)    |         |
| Non-Responder                                   | 352 (68.1%)              | 357 (65.7%)     | 709 (66.9%)    |         |
| Responder Worsening (-10)                       | 62 (12.0%)               | 107 (19.7%)     | 169 (15.9%)    |         |
|                                                 |                          |                 |                |         |
| <b>Health-related quality of life, Month 6</b>  |                          |                 |                | 0.006   |
| Missing                                         | 25                       | 23              | 48             |         |
| N/A: Off-Study                                  | 126 (0.0%)               | 112 (0.0%)      | 238 (0.0%)     |         |
| Responder Improving (+10)                       | 83 (18.8%)               | 73 (15.8%)      | 156 (17.2%)    |         |
| Non-Responder                                   | 302 (68.3%)              | 295 (63.7%)     | 597 (66.0%)    |         |
| Responder Worsening (-10)                       | 57 (12.9%)               | 95 (20.5%)      | 152 (16.8%)    |         |
|                                                 |                          |                 |                |         |
| <b>Health-related quality of life, Month 9</b>  |                          |                 |                | 0.04    |
| Missing                                         | 25                       | 23              | 48             |         |
| N/A: Off-Study                                  | 220 (0.0%)               | 179 (0.0%)      | 399 (0.0%)     |         |
| Responder Improving (+10)                       | 60 (17.2%)               | 59 (14.9%)      | 119 (16.0%)    |         |
| Non-Responder                                   | 236 (67.8%)              | 254 (64.1%)     | 490 (65.9%)    |         |
| Responder Worsening (-10)                       | 52 (14.9%)               | 83 (21.0%)      | 135 (18.1%)    |         |
|                                                 |                          |                 |                |         |
| <b>Health-related quality of life, Month 12</b> |                          |                 |                | 0.23    |
| Missing                                         | 22                       | 27              | 49             |         |
| N/A: Off-Study                                  | 278 (0.0%)               | 230 (0.0%)      | 508 (0.0%)     |         |
| Responder Improving (+10)                       | 53 (18.1%)               | 59 (17.3%)      | 112 (17.7%)    |         |
| Non-Responder                                   | 189 (64.5%)              | 199 (58.4%)     | 388 (61.2%)    |         |
| Responder Worsening (-10)                       | 51 (17.4%)               | 83 (24.3%)      | 134 (21.1%)    |         |

**eTable 7. Preplanned Subgroup Analysis of Physical Function, as Measured by the EORTC QLQ-C30**

A general linear mixed model was fit within each level of the subgroup variable, and effect of the PRO intervention at month 3 was tested similar to the primary analysis. Next, a general linear mixed model of physical function was fit including all patients and included fixed effects for arm, timepoint, and the given subgrouping variable, as well as pairwise interactions between arm and visit, arm and subgroup variable, and visit and subgroup variable. Higher order interactions were explored but found to be statistically insignificant so were removed from the model. A random practice intercept term was included to account for clustering by practice. Repeated observations by patient were modeled using compound symmetric correlation structure over time. The interaction test p-value is based on the Type 3 test of the interaction effect between arm and the given subgroup variable.

| Subgroup                 | Time point | PRO Mean Change from Baseline (95% CI) | P-value of PRO Change from Baseline | Control Mean Change from Baseline (95% CI) | P-value of Control Change from Baseline | Difference in Mean Change from Baseline between Arms (95% CI) | P-value of Difference between Arms | Subgroup Interaction Test P-value |
|--------------------------|------------|----------------------------------------|-------------------------------------|--------------------------------------------|-----------------------------------------|---------------------------------------------------------------|------------------------------------|-----------------------------------|
| <b>Age</b>               |            |                                        |                                     |                                            |                                         |                                                               |                                    | 0.09                              |
| Age <60                  | Month 3    | 3.40 (1.25, 5.56)                      | 0.002                               | -0.44 (-2.52, 1.65)                        | 0.68                                    | 3.84 (0.84, 6.84)                                             | 0.01                               |                                   |
| Age ≥60                  | Month 3    | 0.41 (-1.55, 2.37)                     | 0.68                                | -1.21 (-3.16, 0.74)                        | 0.22                                    | 1.62 (-1.14, 4.38)                                            | 0.25                               |                                   |
| <b>Sex</b>               |            |                                        |                                     |                                            |                                         |                                                               |                                    | 0.72                              |
| Male                     | Month 3    | -0.91 (-3.21, 1.40)                    | 0.44                                | -1.45 (-3.60, 0.71)                        | 0.19                                    | 0.54 (-2.62, 3.69)                                            | 0.74                               |                                   |
| Female                   | Month 3    | 3.13 (1.23, 5.03)                      | 0.001                               | -0.49 (-2.43, 1.45)                        | 0.62                                    | 3.62 (0.91, 6.34)                                             | 0.009                              |                                   |
| <b>Race</b>              |            |                                        |                                     |                                            |                                         |                                                               |                                    | 0.19                              |
| White                    | Month 3    | 0.75 (-0.88, 2.38)                     | 0.37                                | -1.63 (-3.28, 0.02)                        | 0.05                                    | 2.38 (0.06, 4.70)                                             | 0.04                               |                                   |
| Non-white                | Month 3    | 4.68 (1.30, 8.05)                      | 0.007                               | 1.30 (-1.70, 4.30)                         | 0.39                                    | 3.37 (-1.14, 7.89)                                            | 0.14                               |                                   |
| <b>Ethnicity</b>         |            |                                        |                                     |                                            |                                         |                                                               |                                    | 0.97                              |
| Hispanic                 | Month 3    | 4.34 (-5.88, 14.56)                    | 0.40                                | 3.19 (-2.63, 9.01)                         | 0.28                                    | 1.15 (-10.61, 12.91)                                          | 0.85                               |                                   |
| Non-Hispanic             | Month 3    | 1.47 (-0.01, 2.95)                     | 0.05                                | -1.23 (-2.72, 0.26)                        | 0.11                                    | 2.70 (0.60, 4.80)                                             | 0.01                               |                                   |
| <b>Education</b>         |            |                                        |                                     |                                            |                                         |                                                               |                                    | 0.30                              |
| ≤High school             | Month 3    | 2.43 (-0.04, 4.90)                     | 0.05                                | -3.24 (-5.52, -0.95)                       | 0.006                                   | 5.67 (2.30, 9.03)                                             | <0.001                             |                                   |
| ≥Some college            | Month 3    | 1.02 (-0.80, 2.85)                     | 0.27                                | 0.66 (-1.21, 2.54)                         | 0.49                                    | 0.36 (-2.25, 2.98)                                            | 0.79                               |                                   |
| <b>Employment status</b> |            |                                        |                                     |                                            |                                         |                                                               |                                    | 0.51                              |
| Working                  | Month 3    | -0.32 (-2.76, 2.12)                    | 0.80                                | -1.11 (-3.76, 1.53)                        | 0.41                                    | 0.79 (-2.80, 4.39)                                            | 0.67                               |                                   |

| Subgroup              | Time point | PRO Mean Change from Baseline (95% CI) | P-value of PRO Change from Baseline | Control Mean Change from Baseline (95% CI) | P-value of Control Change from Baseline | Difference in Mean Change from Baseline between Arms (95% CI) | P-value of Difference between Arms | Subgroup Interaction Test P-value |
|-----------------------|------------|----------------------------------------|-------------------------------------|--------------------------------------------|-----------------------------------------|---------------------------------------------------------------|------------------------------------|-----------------------------------|
| Not currently working | Month 3    | 2.29 (0.49, 4.10)                      | 0.01                                | -0.90 (-2.62, 0.82)                        | 0.30                                    | 3.19 (0.70, 5.69)                                             | 0.01                               |                                   |
| <b>Marital status</b> |            |                                        |                                     |                                            |                                         |                                                               |                                    | 0.64                              |
| Married/partnered     | Month 3    | 2.19 (0.39, 4.00)                      | 0.02                                | -1.31 (-3.19, 0.57)                        | 0.17                                    | 3.51 (0.90, 6.11)                                             | 0.008                              |                                   |
| Other                 | Month 3    | 0.25 (-2.28, 2.77)                     | 0.85                                | -0.37 (-2.63, 1.90)                        | 0.75                                    | 0.61 (-2.78, 4.00)                                            | 0.72                               |                                   |
| <b>Device use</b>     |            |                                        |                                     |                                            |                                         |                                                               |                                    | 0.86                              |
| Inexperienced         | Month 3    | 3.07 (-1.02, 7.16)                     | 0.14                                | -0.42 (-3.96, 3.13)                        | 0.82                                    | 3.49 (-1.93, 8.90)                                            | 0.21                               |                                   |
| Experienced           | Month 3    | 1.22 (-0.34, 2.77)                     | 0.12                                | -1.04 (-2.62, 0.54)                        | 0.20                                    | 2.26 (0.04, 4.47)                                             | 0.046                              |                                   |
| <b>Internet use</b>   |            |                                        |                                     |                                            |                                         |                                                               |                                    | 0.48                              |
| Inexperienced         | Month 3    | 1.38 (-2.09, 4.85)                     | 0.43                                | 0.20 (-2.91, 3.30)                         | 0.90                                    | 1.18 (-3.47, 5.84)                                            | 0.62                               |                                   |
| Experienced           | Month 3    | 1.59 (-0.00, 3.18)                     | 0.05                                | -1.34 (-2.95, 0.28)                        | 0.11                                    | 2.92 (0.65, 5.19)                                             | 0.01                               |                                   |
| <b>Email use</b>      |            |                                        |                                     |                                            |                                         |                                                               |                                    | 0.20                              |
| Inexperienced         | Month 3    | 2.35 (-0.35, 5.05)                     | 0.09                                | -1.20 (-3.56, 1.15)                        | 0.32                                    | 3.55 (-0.03, 7.14)                                            | 0.05                               |                                   |
| Experienced           | Month 3    | 1.08 (-0.63, 2.79)                     | 0.21                                | -0.66 (-2.49, 1.16)                        | 0.48                                    | 1.75 (-0.75, 4.25)                                            | 0.17                               |                                   |
| <b>Site location</b>  |            |                                        |                                     |                                            |                                         |                                                               |                                    | 0.17                              |
| Urban/Suburban        | Month 3    | 0.98 (-0.72, 2.69)                     | 0.26                                | -0.51 (-2.22, 1.21)                        | 0.56                                    | 1.49 (-0.92, 3.90)                                            | 0.23                               |                                   |
| Rural                 | Month 3    | 3.15 (0.24, 6.05)                      | 0.03                                | -1.95 (-4.64, 0.74)                        | 0.16                                    | 5.10 (1.14, 9.05)                                             | 0.01                               |                                   |
| <b>Cancer type</b>    |            |                                        |                                     |                                            |                                         |                                                               |                                    | 0.12                              |
| Thoracic              | Month 3    | 2.55 (-1.06, 6.16)                     | 0.17                                | -0.48 (-4.27, 3.31)                        | 0.80                                    | 3.03 (-2.21, 8.26)                                            | 0.26                               |                                   |
| Breast                | Month 3    | 2.22 (-1.24, 5.69)                     | 0.21                                | 1.02 (-2.68, 4.72)                         | 0.59                                    | 1.20 (-3.86, 6.27)                                            | 0.64                               |                                   |
| Colorectal            | Month 3    | 2.78 (-0.44, 6.00)                     | 0.09                                | -0.93 (-3.67, 1.82)                        | 0.51                                    | 3.71 (-0.52, 7.94)                                            | 0.09                               |                                   |
| GU                    | Month 3    | -1.35 (-5.52, 2.82)                    | 0.52                                | -3.85 (-8.92, 1.23)                        | 0.14                                    | 2.49 (-4.07, 9.06)                                            | 0.46                               |                                   |
| Gynecologic           | Month 3    | 5.79 (1.15, 10.43)                     | 0.01                                | -3.59 (-8.67, 1.49)                        | 0.17                                    | 9.38 (2.50, 16.27)                                            | 0.008                              |                                   |
| Other                 | Month 3    | -1.10 (-4.14, 1.93)                    | 0.48                                | -0.43 (-3.13, 2.28)                        | 0.76                                    | -0.68 (-4.75, 3.39)                                           | 0.74                               |                                   |

**eTable 8. Individual Symptom Scale Mean Score Estimates and Differences Between Groups in Mean Change From Baseline at Each Measured Timepoint, From the EORTC QLQ-C30 Questionnaire**

| Individual Symptom Scale | Timepoint | PRO Arm Mean Estimate | Control Arm Mean Estimate | Difference in Mean Change from Baseline between Groups (95% CI) | P-value of Difference between Groups |
|--------------------------|-----------|-----------------------|---------------------------|-----------------------------------------------------------------|--------------------------------------|
| Fatigue                  | Baseline  | 40.07                 | 40.48                     | -                                                               | N/A                                  |
|                          | Month 1   | 36.70                 | 41.10                     | -3.99 (-6.62, -1.35)                                            | 0.003                                |
|                          | Month 3   | 36.44                 | 42.29                     | -5.44 (-8.14, -2.74)                                            | <0.001                               |
|                          | Month 6   | 36.72                 | 41.98                     | -4.85 (-7.69, -2.00)                                            | <0.001                               |
|                          | Month 9   | 37.67                 | 44.24                     | -6.15 (-9.20, -3.11)                                            | <0.001                               |
|                          | Month 12  | 38.82                 | 44.13                     | -4.90 (-8.12, -1.68)                                            | 0.003                                |
| Nausea / Vomiting        | Baseline  | 9.92                  | 10.47                     | -                                                               | N/A                                  |
|                          | Month 1   | 8.81                  | 11.98                     | -2.62 (-4.61, -0.62)                                            | 0.01                                 |
|                          | Month 3   | 7.73                  | 10.50                     | -2.22 (-4.26, -0.17)                                            | 0.03                                 |
|                          | Month 6   | 8.90                  | 10.60                     | -1.15 (-3.30, 1.00)                                             | 0.29                                 |
|                          | Month 9   | 9.66                  | 10.47                     | -0.25 (-2.56, 2.05)                                             | 0.83                                 |
|                          | Month 12  | 11.08                 | 11.54                     | 0.10 (-2.34, 2.53)                                              | 0.94                                 |
| Pain                     | Baseline  | 25.92                 | 28.19                     | -                                                               | N/A                                  |
|                          | Month 1   | 23.93                 | 26.89                     | -0.69 (-3.67, 2.28)                                             | 0.65                                 |
|                          | Month 3   | 25.34                 | 29.98                     | -2.37 (-5.41, 0.67)                                             | 0.13                                 |
|                          | Month 6   | 26.87                 | 31.53                     | -2.39 (-5.60, 0.82)                                             | 0.14                                 |
|                          | Month 9   | 28.29                 | 32.23                     | -1.67 (-5.10, 1.77)                                             | 0.34                                 |
|                          | Month 12  | 30.08                 | 32.74                     | -0.39 (-4.03, 3.24)                                             | 0.83                                 |
| Dyspnea                  | Baseline  | 20.22                 | 20.54                     | -                                                               | N/A                                  |
|                          | Month 1   | 20.63                 | 23.30                     | -2.33 (-5.21, 0.54)                                             | 0.11                                 |
|                          | Month 3   | 22.60                 | 24.32                     | -1.39 (-4.34, 1.55)                                             | 0.35                                 |
|                          | Month 6   | 22.61                 | 25.37                     | -2.43 (-5.53, 0.68)                                             | 0.13                                 |
|                          | Month 9   | 24.16                 | 27.04                     | -2.54 (-5.86, 0.77)                                             | 0.13                                 |
|                          | Month 12  | 25.02                 | 24.36                     | 0.98 (-2.53, 4.49)                                              | 0.58                                 |
| Insomnia                 | Baseline  | 28.00                 | 31.67                     | -                                                               | N/A                                  |
|                          | Month 1   | 22.50                 | 30.56                     | -4.39 (-7.86, -0.93)                                            | 0.01                                 |
|                          | Month 3   | 20.81                 | 29.46                     | -4.99 (-8.53, -1.45)                                            | 0.006                                |
|                          | Month 6   | 22.62                 | 29.13                     | -2.85 (-6.58, 0.89)                                             | 0.13                                 |

| Individual Symptom Scale | Timepoint | PRO Arm Mean Estimate | Control Arm Mean Estimate | Difference in Mean Change from Baseline between Groups (95% CI) | P-value of Difference between Groups |
|--------------------------|-----------|-----------------------|---------------------------|-----------------------------------------------------------------|--------------------------------------|
|                          | Month 9   | 21.43                 | 29.19                     | -4.10 (-8.08, -0.11)                                            | 0.04                                 |
|                          | Month 12  | 23.28                 | 30.41                     | -3.47 (-7.68, 0.75)                                             | 0.11                                 |
|                          |           |                       |                           |                                                                 |                                      |
| Appetite loss            | Baseline  | 22.66                 | 22.75                     | -                                                               | N/A                                  |
|                          | Month 1   | 18.77                 | 21.40                     | -2.55 (-5.98, 0.88)                                             | 0.15                                 |
|                          | Month 3   | 18.21                 | 21.34                     | -3.04 (-6.55, 0.47)                                             | 0.09                                 |
|                          | Month 6   | 18.46                 | 21.87                     | -3.32 (-7.01, 0.37)                                             | 0.08                                 |
|                          | Month 9   | 18.24                 | 23.06                     | -4.74 (-8.69, -0.79)                                            | 0.02                                 |
|                          | Month 12  | 21.41                 | 23.15                     | -1.65 (-5.83, 2.52)                                             | 0.44                                 |
|                          |           |                       |                           |                                                                 |                                      |
| Constipation             | Baseline  | 18.03                 | 16.55                     | -                                                               | N/A                                  |
|                          | Month 1   | 15.47                 | 15.37                     | -1.38 (-4.38, 1.62)                                             | 0.37                                 |
|                          | Month 3   | 15.60                 | 15.30                     | -1.18 (-4.25, 1.89)                                             | 0.45                                 |
|                          | Month 6   | 14.78                 | 14.23                     | -0.93 (-4.16, 2.31)                                             | 0.57                                 |
|                          | Month 9   | 16.91                 | 14.59                     | 0.84 (-2.62, 4.30)                                              | 0.63                                 |
|                          | Month 12  | 14.50                 | 15.86                     | -2.84 (-6.49, 0.82)                                             | 0.13                                 |
|                          |           |                       |                           |                                                                 |                                      |
| Diarrhea                 | Baseline  | 13.46                 | 15.58                     | -                                                               | N/A                                  |
|                          | Month 1   | 13.22                 | 16.30                     | -0.97 (-3.96, 2.02)                                             | 0.52                                 |
|                          | Month 3   | 12.40                 | 14.86                     | -0.34 (-3.40, 2.71)                                             | 0.83                                 |
|                          | Month 6   | 13.05                 | 14.08                     | 1.09 (-2.13, 4.30)                                              | 0.51                                 |
|                          | Month 9   | 13.32                 | 12.83                     | 2.60 (-0.84, 6.04)                                              | 0.14                                 |
|                          | Month 12  | 15.41                 | 13.37                     | 4.16 (0.53, 7.80)                                               | 0.02                                 |

**eTable 9. Completion Rates by Study Week**

| <b>Week</b> | <b>N</b> | <b>Completed</b> | <b>Rate</b> |
|-------------|----------|------------------|-------------|
| 0           | 592      | 497              | 84.0%       |
| 1           | 591      | 505              | 85.4%       |
| 2           | 590      | 522              | 88.5%       |
| 3           | 586      | 535              | 91.3%       |
| 4           | 578      | 540              | 93.4%       |
| 5           | 571      | 534              | 93.5%       |
| 6           | 568      | 523              | 92.1%       |
| 7           | 555      | 507              | 91.4%       |
| 8           | 551      | 507              | 92.0%       |
| 9           | 544      | 500              | 91.9%       |
| 10          | 542      | 496              | 91.5%       |
| 11          | 534      | 486              | 91.0%       |
| 12          | 526      | 491              | 93.3%       |
| 13          | 514      | 464              | 90.3%       |
| 14          | 510      | 464              | 91.0%       |
| 15          | 500      | 463              | 92.6%       |
| 16          | 493      | 444              | 90.1%       |
| 17          | 481      | 440              | 91.5%       |
| 18          | 471      | 437              | 92.8%       |
| 19          | 467      | 437              | 93.6%       |
| 20          | 458      | 421              | 91.9%       |
| 21          | 452      | 424              | 93.8%       |
| 22          | 443      | 411              | 92.8%       |
| 23          | 439      | 404              | 92.0%       |
| 24          | 431      | 397              | 92.1%       |
| 25          | 422      | 395              | 93.6%       |
| 26          | 418      | 382              | 91.4%       |
| 27          | 414      | 375              | 90.6%       |
| 28          | 410      | 380              | 92.7%       |
| 29          | 404      | 366              | 90.6%       |
| 30          | 399      | 362              | 90.7%       |
| 31          | 389      | 360              | 92.5%       |
| 32          | 383      | 360              | 94.0%       |
| 33          | 378      | 344              | 91.0%       |
| 34          | 370      | 345              | 93.2%       |
| 35          | 360      | 335              | 93.1%       |

| <b>Week</b> | <b>N</b> | <b>Completed</b> | <b>Rate</b> |
|-------------|----------|------------------|-------------|
| 36          | 356      | 323              | 90.7%       |
| 37          | 347      | 323              | 93.1%       |
| 38          | 345      | 320              | 92.8%       |
| 39          | 342      | 316              | 92.4%       |
| 40          | 336      | 309              | 92.0%       |
| 41          | 334      | 307              | 91.9%       |
| 42          | 330      | 304              | 92.1%       |
| 43          | 326      | 295              | 90.5%       |
| 44          | 320      | 290              | 90.6%       |
| 45          | 312      | 285              | 91.3%       |
| 46          | 310      | 283              | 91.3%       |
| 47          | 306      | 282              | 92.2%       |
| 48          | 303      | 275              | 90.8%       |
| 49          | 301      | 277              | 92.0%       |
| 50          | 295      | 265              | 89.8%       |
| 51          | 289      | 258              | 89.3%       |
| Total       | 22486    | 20565            | 91.5%       |

**eTable 10. Alerts Triggered by the Weekly Survey System to the Care Team, by Symptom**

Individual symptom alerts contained in the alert notification messages triggered by the weekly survey system to the care team. Each notification could include one or more individual symptom alerts (for example, if both nausea and pain surpassed the triggering threshold, both would be included in that week’s alert notification). Among a total of 6,979 alert notifications triggered during the trial, how often each specific symptom item was included as an alert is shown.

| <b>Weekly PRO Survey Symptom Item</b>          | <b># (%) of Alert Notifications Containing the Symptom Item</b> |
|------------------------------------------------|-----------------------------------------------------------------|
| Activity Level (Diminished Performance Status) | 1438 (20.6%)                                                    |
| Appetite Loss                                  | 694 (9.9%)                                                      |
| Constipation                                   | 579 (8.3%)                                                      |
| Depression                                     | 771 (11.1%)                                                     |
| Diarrhea                                       | 1268 (18.2%)                                                    |
| Dyspnea (overall)                              | 959 (13.7%)                                                     |
| <i>Dyspnea Severity</i>                        | 625 (9.0%)                                                      |
| <i>Dyspnea Interference</i>                    | 760 (10.9%)                                                     |
| Fall                                           | 475 (6.8%)                                                      |
| Insomnia                                       | 749 (10.7%)                                                     |
| Nausea (overall)                               | 941 (13.5%)                                                     |
| <i>Nausea Frequency</i>                        | 883 (12.7%)                                                     |
| <i>Nausea Severity</i>                         | 214 (3.1%)                                                      |
| Pain (overall)                                 | 3513 (50.3%)                                                    |
| <i>Pain Severity</i>                           | 1523 (21.8%)                                                    |
| <i>Pain Frequency</i>                          | 3096 (44.4%)                                                    |
| <i>Pain Interference</i>                       | 1565 (22.4%)                                                    |
| Vomiting                                       | 275 (3.9%)                                                      |



# What can I do to manage my sleep problems?

---

## Tips to help you sleep:

- **Tell your cancer care team about problems that are getting in the way of your sleep.** Getting treatment to lower side effects such as pain or bladder or bowel problems may help you sleep better.
- **Set good bedtime habits.**
  - Go to bed only when sleepy, in a quiet and dark room, and in a comfortable bed.
  - Go to bed and wake up at the same time.
  - Avoid napping if possible.
  - Make sure your bedroom is not overly hot or cold.
  - Stop watching television or using devices with screens a couple of hours before going to bed.
    - Devices like: iPads, laptops, and smart phones.
  - Don't drink or eat a lot starting about 2-3 hours before bedtime.
  - Exercising too close to bedtime may make sleep more difficult.
    - Exercise before 2:00pm promotes sleep.
  - Don't watch the clock at night.
  - Keep out pets who wake you up.
- **Don't stay awake in bed** for more than 5-10 minutes. If you do not fall asleep, get out of bed, sit in a chair in the dark until you are sleepy. It's okay if this happens several times a night.
- **Avoid caffeine after midday.** Also cigarettes, alcohol and some 'over-the-counter' medications may interfere with sleep.
- **Sleep medicine may be prescribed** by your cancer care team for a short period if other strategies don't work.
- **Cognitive behavioral therapy (CBT) and/or relaxation therapy may help.** For example, a CBT therapist can help you learn to change negative thoughts and beliefs about sleep into positive ones.
  - Muscle relaxation, guided imagery, and self-hypnosis may help.

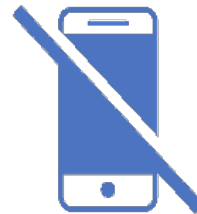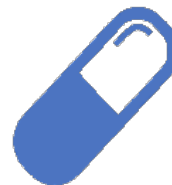

## eFigure 2. Example Clinician-Level Educational Materials for Symptom Management

2017 version for trial

| <b>PAIN</b>                                                                                                                                                                                                                                                                                                                                                                                                                                                                                                                                                                                                                                                                                                                                                                                                                                                                                                                                                                                                                                                                                                                                                                                                                                                                                                                                                                                                                                                                                                                                                                                                                                                                                                                                                                                                                                                                        |                                          |                                      |                                 |
|------------------------------------------------------------------------------------------------------------------------------------------------------------------------------------------------------------------------------------------------------------------------------------------------------------------------------------------------------------------------------------------------------------------------------------------------------------------------------------------------------------------------------------------------------------------------------------------------------------------------------------------------------------------------------------------------------------------------------------------------------------------------------------------------------------------------------------------------------------------------------------------------------------------------------------------------------------------------------------------------------------------------------------------------------------------------------------------------------------------------------------------------------------------------------------------------------------------------------------------------------------------------------------------------------------------------------------------------------------------------------------------------------------------------------------------------------------------------------------------------------------------------------------------------------------------------------------------------------------------------------------------------------------------------------------------------------------------------------------------------------------------------------------------------------------------------------------------------------------------------------------|------------------------------------------|--------------------------------------|---------------------------------|
| <p>Pain is common in patients with cancer and impacts patients' functional status and quality of life.</p> <ul style="list-style-type: none"> <li>• Cancer patients often have multiple sites of pain.</li> <li>• Cancer pain is associated with increased emotional distress and risk of developing depression.</li> </ul> <p>Sources of pain in cancer patients include:</p> <ul style="list-style-type: none"> <li>• Direct effects of cancer (bone pain, pressure on internal organs, ascites).</li> <li>• Surgery pain.</li> <li>• Radiation therapy (mucositis, dermatologic changes, brachytherapy pain, mucosal inflammation).</li> <li>• Chemotherapy or targeted therapy (arthralgia, myalgia, neuropathy, bowel function changes, mucositis, rash).</li> <li>• Diagnostic procedures.</li> <li>• Other health conditions (arthritis, osteoporosis)</li> </ul>                                                                                                                                                                                                                                                                                                                                                                                                                                                                                                                                                                                                                                                                                                                                                                                                                                                                                                                                                                                                           |                                          |                                      |                                 |
| <b>Assessment</b>                                                                                                                                                                                                                                                                                                                                                                                                                                                                                                                                                                                                                                                                                                                                                                                                                                                                                                                                                                                                                                                                                                                                                                                                                                                                                                                                                                                                                                                                                                                                                                                                                                                                                                                                                                                                                                                                  |                                          |                                      |                                 |
| <ul style="list-style-type: none"> <li>• Assess pain medication history.                             <ul style="list-style-type: none"> <li>○ What is prescribed, what is the patient actually taking, how it is working?</li> <li>○ Is the patient taking opioids, and are they long acting, short acting, or both?</li> <li>○ How long has the patient been on their pain regimen?</li> </ul> </li> <li>• Conduct comprehensive pain assessment:                             <ul style="list-style-type: none"> <li>○ Location of pain (Where does pain originate? Does it radiate to another area of the body?).</li> <li>○ Intensity of pain (use pain scale of 0-10 with 10 being the worst pain imaginable).</li> <li>○ Quality of pain (sharp, stabbing, burning, aching).</li> <li>○ Using scale of 1-10 with 10 being the worst pain imaginable: What is your pain at its best? What is it at its peak? What is your pain after taking your pain medications?</li> <li>○ Assess for breakthrough pain (Does the pain return or increase in intensity before the next dose?).</li> <li>○ Onset, duration and aggravating/alleviating factors (When does it start? What makes it worse/better? How often does it occur? How long does it last?)</li> </ul> </li> <li>• Assess for changes in activity level, sleep, general activities of daily living, depression.</li> <li>• If taking opioids, assess for constipation.</li> </ul>                                                                                                                                                                                                                                                                                                                                                                                                                                       |                                          |                                      |                                 |
| <b>Severity</b>                                                                                                                                                                                                                                                                                                                                                                                                                                                                                                                                                                                                                                                                                                                                                                                                                                                                                                                                                                                                                                                                                                                                                                                                                                                                                                                                                                                                                                                                                                                                                                                                                                                                                                                                                                                                                                                                    |                                          |                                      |                                 |
| <b>Grade 1 Mild</b>                                                                                                                                                                                                                                                                                                                                                                                                                                                                                                                                                                                                                                                                                                                                                                                                                                                                                                                                                                                                                                                                                                                                                                                                                                                                                                                                                                                                                                                                                                                                                                                                                                                                                                                                                                                                                                                                | <b>Grade 2 Moderate</b>                  | <b>Grade 3 Severe</b>                | <b>Grade 4 Life Threatening</b> |
| Mild pain                                                                                                                                                                                                                                                                                                                                                                                                                                                                                                                                                                                                                                                                                                                                                                                                                                                                                                                                                                                                                                                                                                                                                                                                                                                                                                                                                                                                                                                                                                                                                                                                                                                                                                                                                                                                                                                                          | Moderate pain; limiting instrumental ADL | Severe pain; limiting self-care, ADL |                                 |
| <b>Interventions Based on Severity</b>                                                                                                                                                                                                                                                                                                                                                                                                                                                                                                                                                                                                                                                                                                                                                                                                                                                                                                                                                                                                                                                                                                                                                                                                                                                                                                                                                                                                                                                                                                                                                                                                                                                                                                                                                                                                                                             |                                          |                                      |                                 |
| <p><b>Management of Pain:</b></p> <ol style="list-style-type: none"> <li>1. Non-opioids (acetaminophen, COX-2 inhibitor, NSAID). Note that COX-2 inhibitor (celecoxib, meloxicam) does not inhibit platelet aggregation; NSAID toxic effects can include acute renal failure, gastrointestinal toxicity, cardiovascular toxicity, and CNS toxicity such as memory loss and confusion. NSAIDs should be avoided or used with caution if patient has: stomach or intestinal ulcers; cardiovascular disease and/or hypertension; kidney disease; bleeding disorders; pregnancy; taking other prescription anti-coagulants such as warfarin (Coumadin) or heparin, phenytoin (Dilantin), and/or cyclosporine; use of acetaminophen may cause hepatic injury; use caution with liver disease.</li> <li>2. Opioids such as morphine when pain persists or increases and cannot be controlled by non-opioids.</li> <li>3. Non-medication treatments should be offered for all patients with pain. These include emotional support, distraction (music, social engagement), appropriate physical activity (positioning, cushioning, supportive devices, exercise. Physical therapy), and topical application of heat or cold.</li> </ol> <p><b>Considerations:</b></p> <ul style="list-style-type: none"> <li>○ Pain medication scheduled "around the clock" when pain is constant. Consider long-acting agent.</li> <li>○ Use the simplest route of administration possible.</li> <li>○ Consider additional supportive drugs to address anxiety, depression, or neuropathic pain symptoms.</li> <li>○ Provide patient/family/caregiver education about treatment approaches and safe medication use.</li> <li>○ Consider suggesting a pain diary to monitor characteristics of pain, medication regimen, and response to medication.</li> <li>○ No driving when using opioids.</li> </ul> |                                          |                                      |                                 |

This form and its content are for use by health care providers, not patients, is provided as general health information and is a tool to assist clinicians in the assessment of patients, and is not intended to: invite or establish a health care provider-patient relationship, constitute furnishing professional services, constitute, or substitute for, the advice or judgment of a medical professional; or serve as the sole basis for medical treatment.

**eFigure 3. Example Actual Clinician Report Showing Longitudinal Trajectory of Patient-Reported Outcomes (for Visualizing/Printing at Clinic Visit)**

Patient name and identifiers have been removed. For symptoms based on the PRO-CTCAE, composite grades are generated in reports based on a published algorithm (*Clin Trials*. 2021 Feb;18(1):104-114).

## Patient Symptom Report

This is a symptom report based on answers your patient self-reported weekly for the past 10 weeks in the PRO-TTECT trial.

██████████ ██████████ Date Range: 5/20/2020 - 7/24/2020 MRN: \_\_\_\_\_

- ❗ Severe symptoms on 7/24/2020: Pain, Constipation
- ❗ Worsened symptoms between 7/16/2020 and 7/24/2020: Pain, Vomiting
- ❗ Falls: None
- ✅ Improved symptoms between 7/16/2020 and 7/24/2020: Food/Fluid Intake

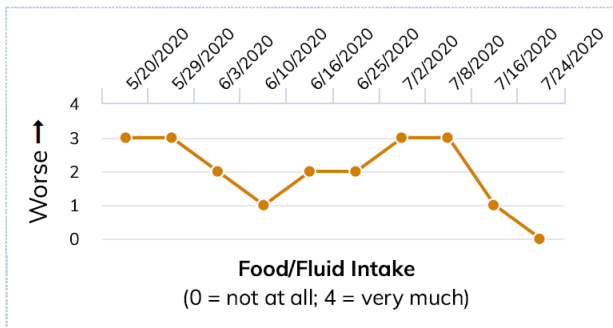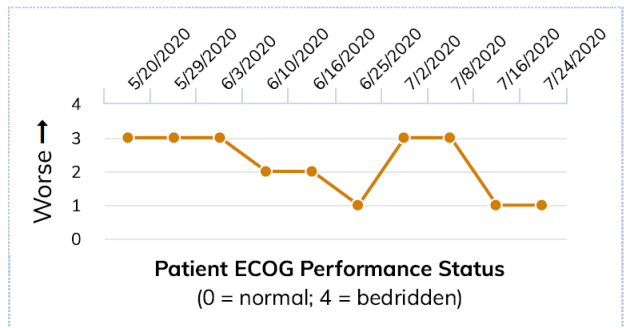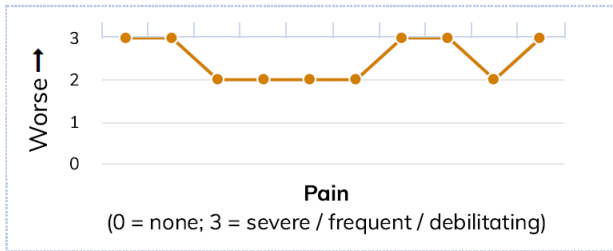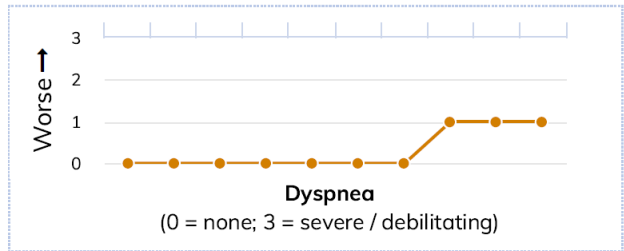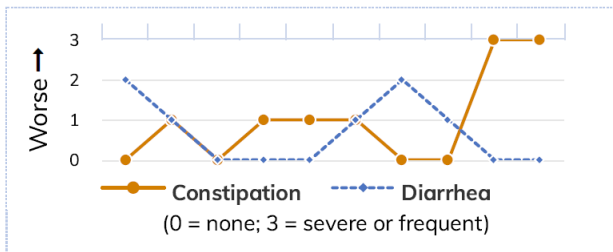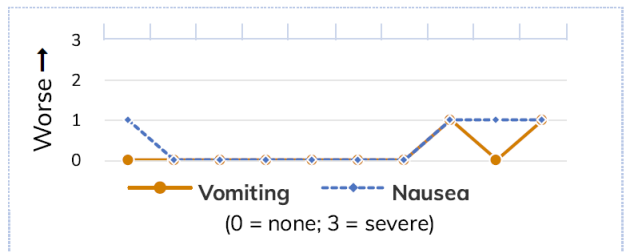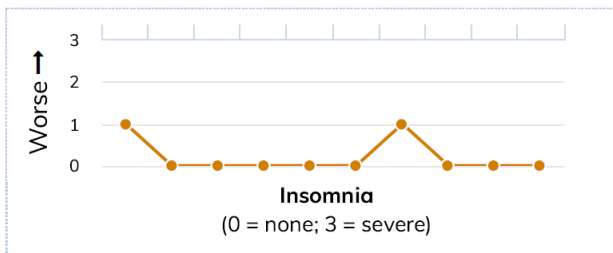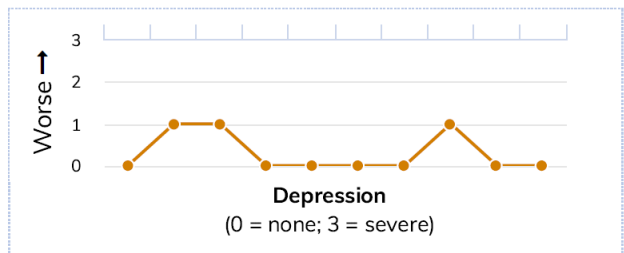

Patient write-ins of other symptoms:

- None reported

**eFigure 4. Responder Analysis**

Proportion of patients experiencing improved, stable, or worsened outcomes at 3 months compared to baseline based on a 5-point change from baseline in the 100-point physical function scale of the EORTC QLQ-C30 questionnaire.

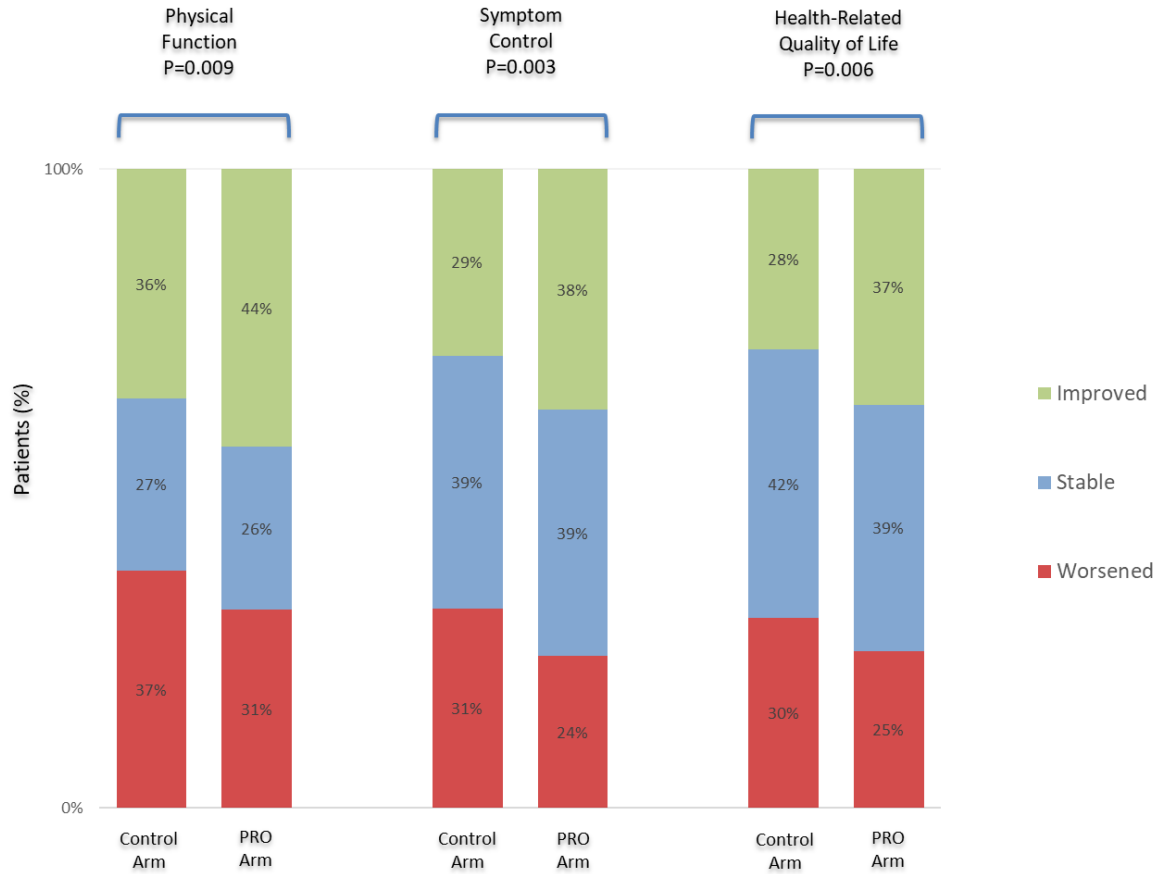

*PRO, patient-reported outcome*

### eFigure 5. Preplanned Subgroup Analysis of Physical Function, as Measured by the EORTC QLQ-C30

This graphic uses general linear mixed models of physical function including all patients with fixed effects for arm, timepoint, and the given subgrouping variable, as well as pairwise interactions between arm and visit, arm and subgroup variable, and visit and subgroup variable. Higher order interactions were explored but found to be statistically insignificant so were removed from the model. A random practice intercept term was included to account for clustering by practice. Repeated observations by patient were modeled using compound symmetric correlation structure over time. The interaction test p-value is based on the Type 3 test of the interaction effect between arm and the given subgroup variable. Difference in confidence intervals were computed from a contrast statement within each mixed model. Data are also shown in eTable 8.

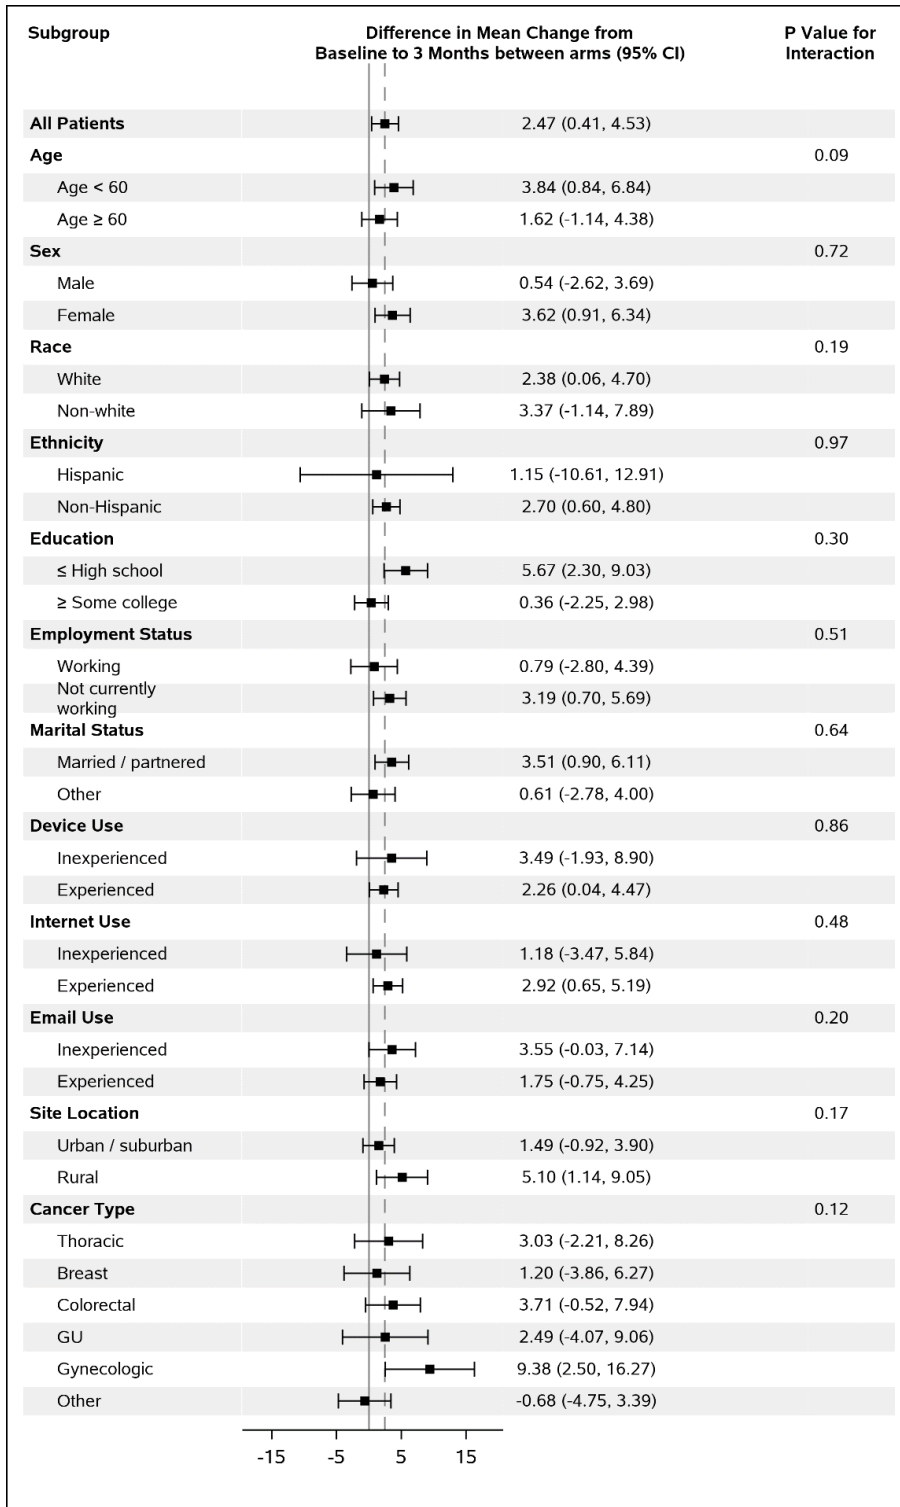

**eFigure 6. Responder Sensitivity Analysis**

Proportion of patients experiencing clinically meaningful improved, stable, or worsened outcomes at 3 months compared to baseline, at control arm practices versus patient-reported outcome (PRO) intervention arm practices, based on a 10-point change from baseline in the 100-point scales of the EORTC QLQ-C30 questionnaire. Data are also shown in **eTable 7**. A primary analysis reported in the manuscript text and in **Figure 2** employing a 5-point change threshold shows similar results.

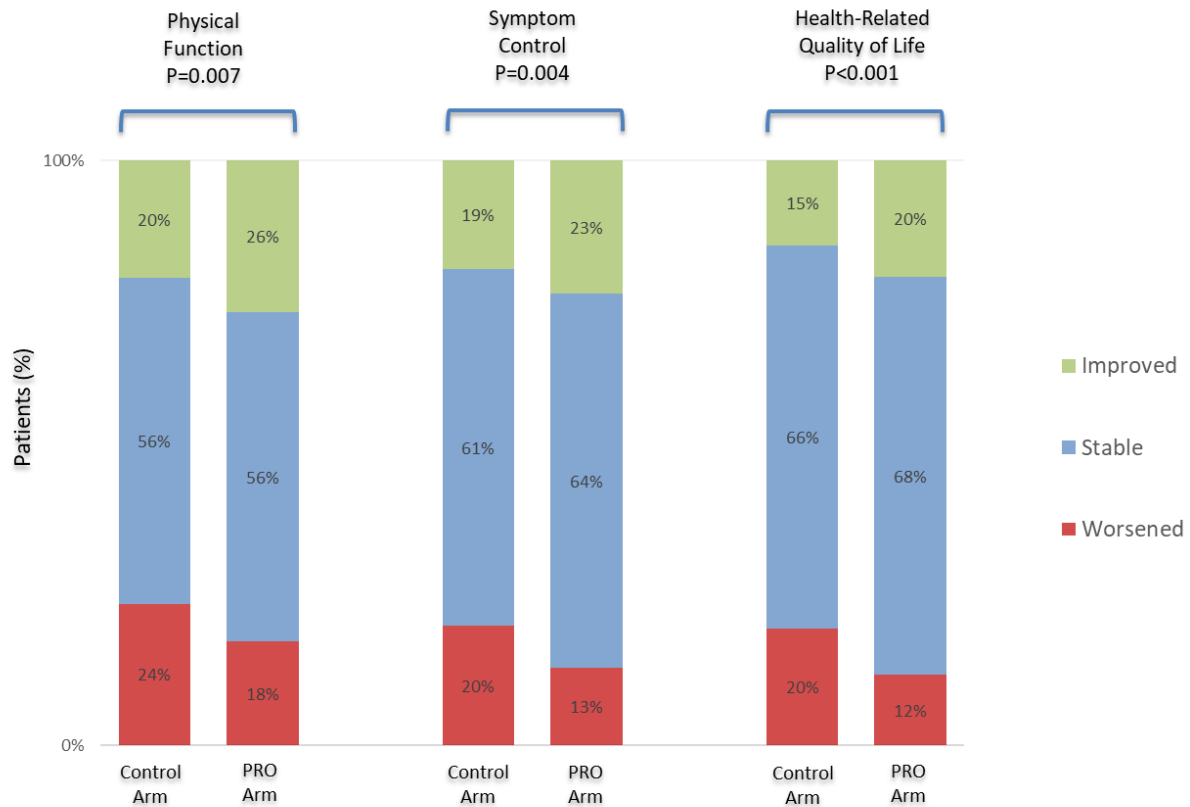

*PRO, patient-reported outcome*

## eFigure 7. Mean Changes From Baseline at Each Visit for Symptom Scales

Mean changes from baseline at each visit for symptom scales for patients at oncology practices allocated to patient-reported outcomes (PRO) vs control, as measured by the EORTC QLQ-C30. Negative values represent improvements. + denotes between-arm difference p-value <0.05, and ++ denotes between-arm difference p-value <0.01.

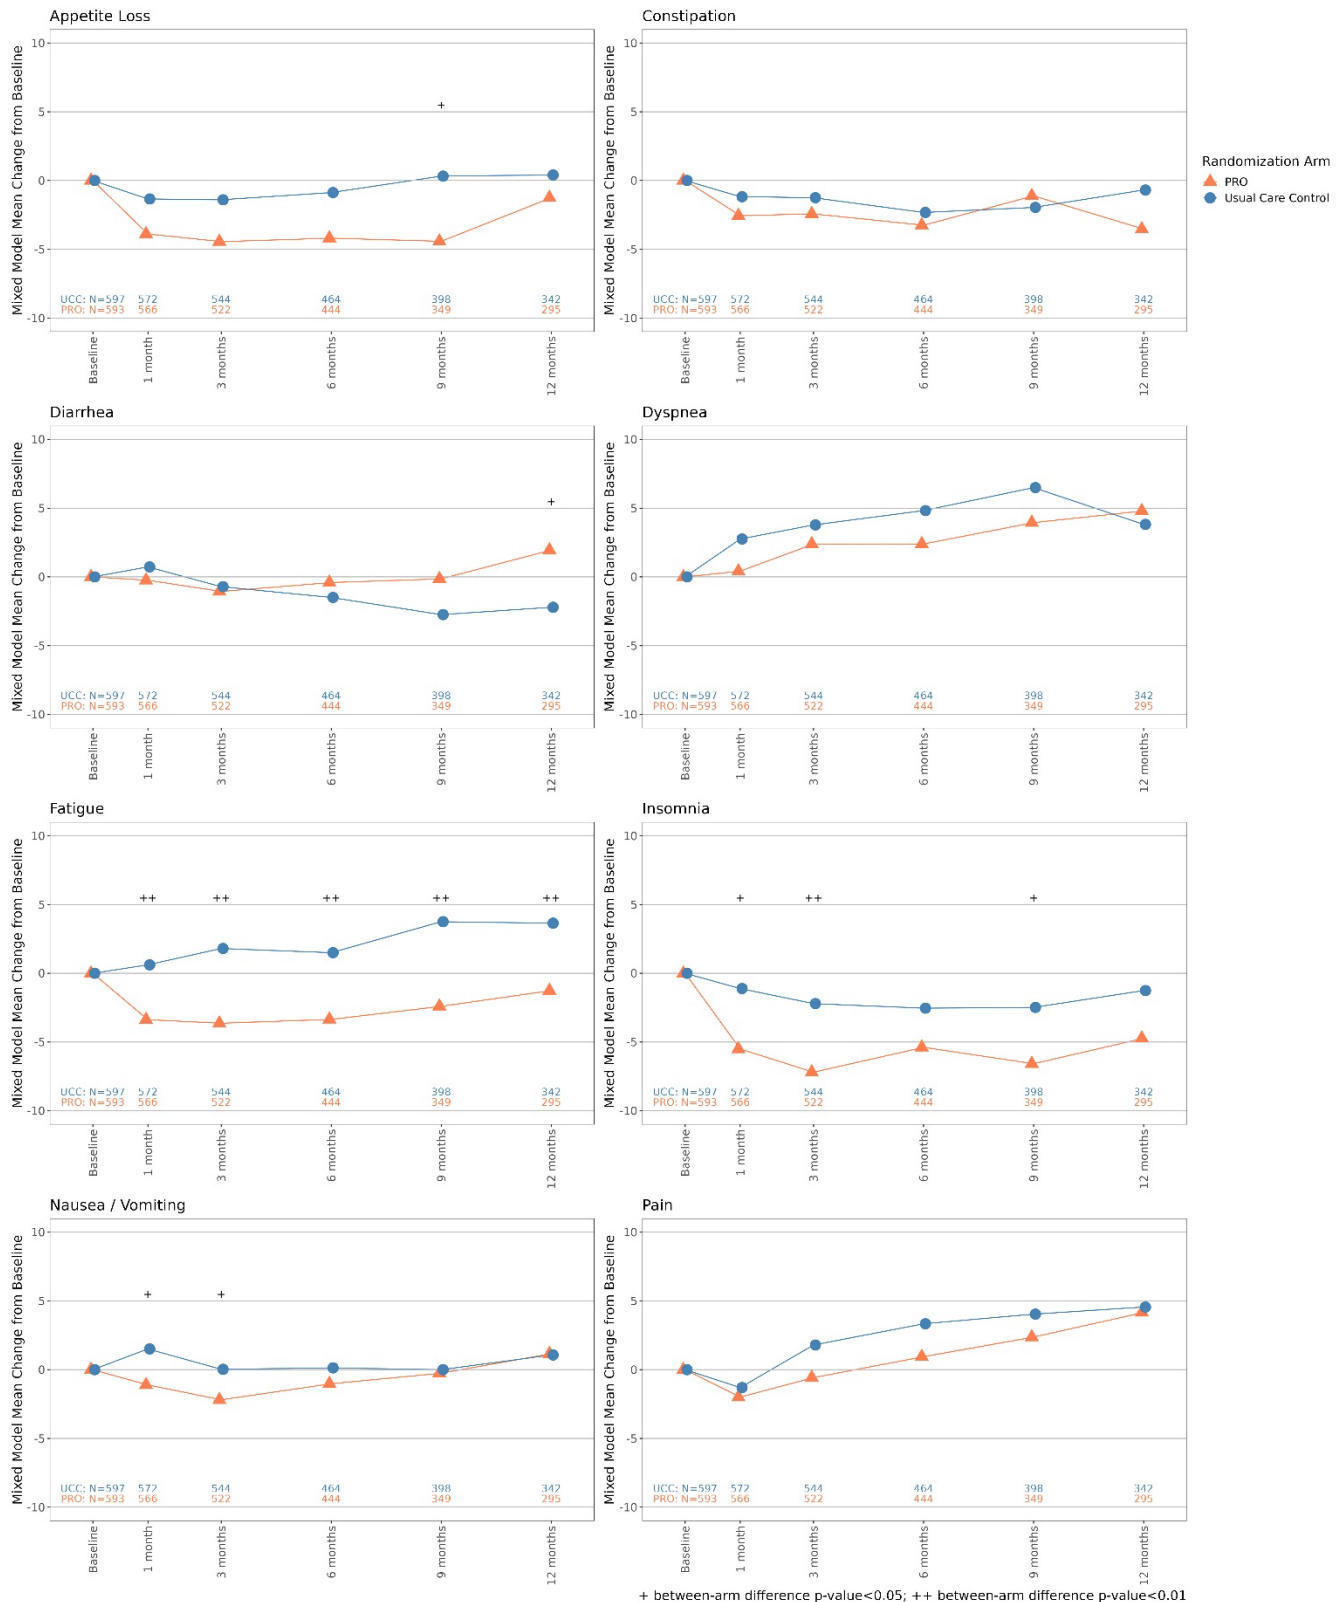

Supplement: jama-e229265-s002.pdf [file jama-e229265-s002.pdf]
