# Supplementary material
Source: PubMed Central journal article supplement (PMC9168923)
Supplement: jama-e229265-s003.pdf [file jama-e229265-s003.pdf]

Basch E, Schrag D, Henson S, et al. Effect of electronic symptom monitoring on patient-reported outcomes among patients with metastatic cancer: a randomized clinical trial. *JAMA*. Published online June 5, 2022. doi:10.1001/jama.2022.9265

## Data Sharing Statement

### Data

**Data available:** Yes

**Data types:** Deidentified participant data, Data dictionary

**How to access data:** Investigators may submit a request for data from this published trial by completing an Alliance Data Sharing Request Form, found at <https://www.allianceforclinicaltrialsinoncology.org/main/cmsfile?cmsPath=/Public/Datasharing/files/Alliance-DataRequestForm-11112020.docx>, and submitting it to [concepts@allianceNCTN.org](mailto:concepts@allianceNCTN.org). Once received, the request will be forwarded to the Alliance Statistics and Data Management Center (SDMC) and Cancer Care Delivery Research Committee. The SDMC will confirm the availability of the data. Once the SDMC confirms availability, and the Cancer Care Delivery Research Committee approves the request, the investigator will be sent a Data Release. Once the Data Release is received from the requesting investigator, the SDMC will be notified that the requested data may be released.

**When available:** beginning date: 09-01-2024

### Supporting Documents

**Document types:** None

### Additional Information

**Who can access the data:** Investigators may submit a request for data from this published trial by completing an Alliance Data Sharing Request Form, found at <https://www.allianceforclinicaltrialsinoncology.org/main/cmsfile?cmsPath=/Public/Datasharing/files/Alliance-DataRequestForm-11112020.docx>, and submitting it to [concepts@allianceNCTN.org](mailto:concepts@allianceNCTN.org). Once received, the request will be forwarded to the Alliance Statistics and Data Management Center (SDMC) and Cancer Care Delivery Research Committee. The SDMC will confirm the availability of the data. Once the SDMC confirms availability, and the Cancer Care Delivery Research Committee approves the request, the investigator will be sent a Data Release. Once the Data Release is received from the requesting investigator, the SDMC will be notified that the requested data may be released.

**Types of analyses:** Any purpose.

**Mechanisms of data availability:** See above Alliance policy.
